# Supplementary material for: Natural Products from Red Algal Genus Laurencia as Potential Inhibitors of RdRp and nsp15 Enzymes of SARS-CoV-2: An In Silico Perspective
Source: MDPI journal article supplement (doi:10.3390/microbiolres14030069), 2023-07-31
Supplement: s1 [file s1]

# Natural products from Red Algal Genus *Laurencia* as Potential Inhibitors of RdRp and nsp15 Enzymes of SARS-CoV-2: An In Silico Perspective

Omkar Pokharkar <sup>1\*</sup>, Harshavardhan Anumolu <sup>2</sup>, Grigory Zyryanov <sup>1,3\*</sup>, and Mikhail Tsurkan <sup>4</sup>

## Supplementary Information

### Genus *Laurencia* Ligand Library (300 Natural products)

|                                                         | A                        | B                    |
|---------------------------------------------------------|--------------------------|----------------------|
| (-)-3-(E)-bromomethylidene-10beta-bromo-beta-chamigrene | Acetylmajapolene A       | Beta Synderol        |
| (+)-3-(Z)-bromomethylidene-10beta-bromo-beta-chamigrene | Acetylmajapolene B       | Brasilenol           |
| (3Z)-laurenyne                                          | Aldingenin A             | Bromocyclococanol    |
| (5S)-5-Acetoxy-beta-bisabolene                          | Aldingenin B             | Beta cryptoxanthin   |
| (6R,9R,10S)-10-bromo-9-hydroxyhamigra-2,7(14)-diene     | Aldingenin C             | Beta-sitosterol      |
| (10R)-10-Bromo-alpha-chamigrene                         | Aldingenin D             | Bosseopentanoic acid |
| 1,2-Dehydro-3,4-epoxypalisadin B                        | Allolaurinterol          | Brassicasterol       |
| 1-methyl-2,3,5-tribromoindole                           | Allolaurinterolacetate   | Bromlaurenidificin   |
| 2-bromospironippol                                      | Aplysinol                | Bromophycoic acid A  |
| 2-Hydroxyluzofuranone A                                 | Aplysistatin             | Bromophycoic acid B  |
| 2-Hydroxyluzofuranone B                                 | Aristolan-8-en-1-one.mol | Bromophycoic acid C  |
| 3,4-epoxypalisadin B                                    | Aristolan-10-ol-9-one    | Bromophycoic acid D  |
| 3,7-dihydroxydihydrolaurene                             | Aristolane               | Bromophycoic acid E  |
| 3alpha-hydroperoxy-3-epiaplysin                         | AxinysonB                | Bromophycolide A     |
| 3alpha-Hydroxydebromoaplysin                            | Aplysiodiol              | Bromophycolide B     |
| 3beta-Hydroperoxyaplysin                                | Aplysiol-7-one           | Bromophycolide C     |

|                                             |                 |                  |
|---------------------------------------------|-----------------|------------------|
| 3-Bromo-4, 5-dihydroxybenzaldehyde          | Aplysiolic acid | Bromophycolide D |
| 3-Bromobarekoxide                           | Almadioxide     | Bromophycolide E |
| 3-Epi-PerforenoneA                          | Aromadendrene   | Bromophycolide F |
| 3R,4S-luzonolone                            |                 | Bromophycolide G |
| 3S, 4R-luzonolone                           |                 | Bromophycolide H |
| 4-Hydroxy-1,8-epi-isotenerone               |                 | Bromophycolide I |
| 4-hydroxypalisidin C                        |                 | Bromophycolide J |
| 5-acetoxyoachamigrene                       |                 | Bromophycolide K |
| 5-acetoxypalisadin B                        |                 | Bromophycolide L |
| 5alpha-cholestane-3,6-dione                 |                 | Bromophycolide M |
| 5alpha-Hydroxyaplysin                       |                 | Bromophycolide N |
| 5-epi-maneolactone                          |                 | Bromophycolide O |
| 6,8-cycloeudesmane                          |                 | Bromophycolide P |
| 6-hydroxycholest-4-en-3-one                 |                 | Bromophycolide Q |
| 7-acetyl-aplysiol                           |                 | Bromophycolide R |
| 7-hydroxylaurene                            |                 | Bromophycolide S |
| 8,10-dibromoisoplysin                       |                 | Bromophycolide T |
| 9-Deoxyelatol                               |                 | Bromophycolide U |
| 9-hydroxy-3-epi-perforenone A               |                 | Barekoxide       |
| 9-octadecanoic acid                         |                 | Bromocuparene    |
| 10-acetoxyangasiol                          |                 |                  |
| 10-Bromo-beta-chamigrene                    |                 |                  |
| 10-Bromoisoplysin                           |                 |                  |
| 10-hydroxyisolaurene                        |                 |                  |
| 10-epi-Dehydrothyriferol                    |                 |                  |
| 10-Hydroxyaplysin                           |                 |                  |
| 11,14-dihydroaplysia-5,11,14,15-Tetrol (AA) |                 |                  |
| 12-hydroxy Isolaurene                       |                 |                  |

| 12-Hydroxypalisadin B          |                           |                         |
|--------------------------------|---------------------------|-------------------------|
| 13-Hydroxyprathyrsenol A       |                           |                         |
| 14-methylpentadecanoic acid    |                           |                         |
| 15-hydroxypalisadin A          |                           |                         |
| 15,16-Dehydrovenustatriol      |                           |                         |
| 15-DehydroxythyrserenolA       |                           |                         |
| 15-Hydroxylarene               |                           |                         |
| 15-Oxolarene                   |                           |                         |
| 16-Hydroxydehydrothyrseriferol |                           |                         |
| C                              | D, E, F                   | G, H, I                 |
| Callicladol                    | Debromoepiaplysinol       | Guimarediol             |
| Callophycoic acid A            | Debromoisocalenzanol      | Halomon                 |
| Callophycoic acid B            | Debromolaurinterol        | Heterocladol            |
| Callophycoic acid C            | Debromolaurinterolacetate | Hordenine               |
| Callophycoic acid D            | Dendroidiol               | Isolaurenidificin       |
| Callophycoic acid E            | Dendroidone               | Isoafricanol            |
| Callophycoic acid F            | Deoxypropacifenol         | Isoallolaurinterol      |
| Callophycoic acid G            | Deschloroelatol           | Isoaplysin              |
| Callophycoic acid H            | Dactylyne                 | Isodactyloxene A        |
| Callophycoic acid I            | Debromoaplysin            | Isodebromolaurinterol   |
| Callophycoic acid J            | Dehydrothyrseriferol      | Isolaurenisol           |
| Callophycol A                  | Dehydrovenustatriol       | Isoobtusol              |
| Callophycol B                  | Elatol                    | Isopalisol              |
| Campesterol                    | Epiaplysinol              | Isorigidol              |
| Callenzanol                    | Epibrasilenol             | Intricenylene           |
| Chamigrene epoxide             | Elatenylene               | Isocaespitol            |
| Chamigrene Lactone             | Filiformin                | Isodehydrothyrseriferol |
| Chinzallene                    | Filiforminol              | Isodihydrolarene        |

---

|                         |             |               |
|-------------------------|-------------|---------------|
| Compositacin A          | Floridoside | Isolaurallene |
| Compositacin B          |             | Isolaureatin  |
| Compositacin C          |             | Isolaurene    |
| Compositacin D          |             | ItomanindoleA |
| Compositacin E          |             |               |
| Compositacin F          |             |               |
| Compositacin G          |             |               |
| Compositacin H          |             |               |
| Compositacin I          |             |               |
| Compositacin J          |             |               |
| Compositacin K          |             |               |
| Compositacin L          |             |               |
| Compositacin M          |             |               |
| Compositacin N          |             |               |
| Cycloelatanene A        |             |               |
| Cycloelatanene B        |             |               |
| Cycloisoallolaurinterol |             |               |
| Chlorofucin             |             |               |
| Cholest-4-en-3,6-dione  |             |               |
| Cholest-4-en-3-one      |             |               |
| Cholest-5-en-3alpha-ol  |             |               |
| Cholest-5-en-3beta-ol   |             |               |
| Cupalaurenol            |             |               |
| Caespitane              |             |               |
| Caespitol               |             |               |
| Caesspitenone           |             |               |
| Cycloeudesmol           |             |               |
| Cyclolaurenol           |             |               |

| J, K, L                | M, N, O              | P, R, S, T                    |
|------------------------|----------------------|-------------------------------|
| Japonenyne A           | Ma'iliohydrin        | Pacifenol                     |
| Johnstonol             | Mailione             | Palisadin A                   |
| Kumausallene           | Majapolene A         | Palisadin B                   |
| Lactodehydrothysiferol | Majapolene B         | Palisadin C                   |
| Laurallene             | Mammeisin            | Palisadin D                   |
| Laureacetal A          | Microcladallene A    | Pannosane                     |
| Laureacetal B          | Microcladallene B    | Pannosanol                    |
| Laureacetal C          | Microcladallene C    | Perforatone                   |
| Laurefurenyne A        | Neurymenolide A      | Perforenol                    |
| Laurefurenyne B        | Neurymenolide B      | Perforenone A                 |
| Laurefurenyne C        | Neoirietetraol       | Prepacifenol                  |
| Laurefurenyne D        | Neoisoprelaurefucin  | Predehydrovenustatriolacetate |
| Laurefurenyne E        | Neolaurallene        | Prelaureatin                  |
| Laurefurenyne F        | Nidificene           | Prethysenol A                 |
| Laurencenyne           | Notoryne             | Pseudo-dehydrothysiferol      |
| Laurencial             | Octadecanedioic acid | Rhodophytin                   |
| Laurendecumallene A    | Obtusane             | Saringosterol                 |
| Laurendecumallene B    | Okamurene A          | Scopariol                     |
| Laurendecumenyne A     | Okamurene B          | Seco-Laurokamurone            |
| Laurendecumenyne B     | Okamurene C          | Spirolaurenone                |
| Laurenenyne            | Okamurene D          | Stigmasterol                  |
| Laurenisol             | Okamurene E          | Tiomanene                     |
| Laurenone A            | Omaezallene          | Thysenol A                    |
| Laureoxanyne           | Oxachamigrene        | Thysenol B                    |
| Laurebiphenyl          | Oryzalexin S         | Thysiferol                    |
| Laurecomin A           |                      | Trans-Deacetylkumausyne       |
| Laurecomin B           |                      | Trans-Kumausyne               |

|                     |  |                    |
|---------------------|--|--------------------|
| Laurecomin C        |  | Trans-Laurencenyne |
| Laurecomin D        |  |                    |
| Laurencomposidiene  |  |                    |
| Laurene             |  |                    |
| Laurenokomarin      |  |                    |
| Laurentristich-4-ol |  |                    |
| Laureperoxide       |  |                    |
| Laurepoxyene        |  |                    |
| Laurinterolacetate  |  |                    |
| Laurokamurene A     |  |                    |
| Laurokamurene B     |  |                    |
| Laurokamurene C     |  |                    |
| Laurokamurene D     |  |                    |
| Luzofuran           |  |                    |
| Luzondiol           |  |                    |
| Luzonenone          |  |                    |
| Luzonensin          |  |                    |
| Luzonensol          |  |                    |
| Luzonensolacetate   |  |                    |
| Laurepinnacin       |  |                    |
| Laurinterol         |  |                    |
| Lithothamin A       |  |                    |

**Table S1:** 300 natural products from the red algal Genus *Laurencia* involved in this work

| RDRP N-Terminal               |                                  |                                                                                                |
|-------------------------------|----------------------------------|------------------------------------------------------------------------------------------------|
| Ligands                       | Binding affinity ('-4.0 to -4.9) | Interacting amino acids                                                                        |
| 1-methyl-2,3,5-tribromoindole | -4.8                             | LYS47 TYR129 HIS133 ASN138 SER709 LYS780 ASN781 SER784                                         |
| 6,8-cycloeudesmane            | -4.9                             | TYR32 ALA46 LYS47 TYR129 SER709 THR710 ASP711                                                  |
| 9-octadecanoic acid           | -4                               | TYR32 LYS47 PHE48 TYR129 HIS133 ALA706 SER709 THR710 ASP711 LYS714 GLN773 GLY774 LYS780 ASN781 |
| 14-methylpentadecanoic acid   | -4.5                             | LYS47 TYR129 ALA130 HIS133 ASP135 ASN138 CYS139 ASP140 THR141 LEU142 SER709 LYS780 ASN781      |
| Beta Synderol                 | -4.7                             | TYR32 ALA46 LYS47 TYR129 HIS133 SER709 THR710 ASP711 LYS780 ASN781                             |
| Halomon                       | -4                               | ALA46 LYS47 TYR129 ALA706 SER709 THR710 ASP711 LYS714 ALA771 GLN773 GLY774 LYS780 ASN781       |
| Luzonensin                    | -4.7                             | TYR32 ALA46 LYS47 TYR129 SER709 THR710 ASP711 LYS714                                           |
| Hordenine                     | -4.5                             | LYS47 TYR129 ALA130 HIS133 PHE134 ASP135 ASN138 CYS139 ASP140 THR141 LEU142 LYS780             |
| Laurencenyne                  | -4                               | TYR32 ALA46 LYS47 TYR129 SER709 THR710 ASP711 LYS714 LYS780                                    |
| Trans-Laurencenyne            | -4.2                             | TYR32 ALA46 LYS47 TYR129 SER709 THR710 ASP711 LYS780                                           |

**Table S2:** Natural products listed under subcategory 1 in low class for RdRp

| RDRP N-Terminal                                         |                                  |                                                                                |
|---------------------------------------------------------|----------------------------------|--------------------------------------------------------------------------------|
| Ligands                                                 | Binding affinity ('-5.0 to -5.9) | Interacting amino acids                                                        |
| (-)-3-(E)-bromomethylidene-10beta-bromo-beta-chamigrene | -5.5                             | TYR32 ALA46 LYS47 TYR129 ASN138 SER709 THR710 ASP711 LYS714                    |
| (+)-3-(Z)-bromomethylidene-10beta-bromo-beta-chamigrene | -5.5                             | TYR32 ALA46 LYS47 TYR129 SER709 THR710 ASP711 LYS714 SER772 GLN773 GLY774      |
| (5S)-5-Acetoxy-beta-bisabolene                          | -5.2                             | TYR32 ALA46 LYS47 PHE48 TYR129 SER709 THR710 ASP711 LYS714 GLN773 GLY774       |
| (6R,9R,10S)-10-bromo-9-hydroxychamigra-2,7(14)-diene    | -5.9                             | TYR32 ALA46 LYS47 PHE48 TYR129 SER709 THR710 ASP711                            |
| (10R)-10-Bromo-alpha-chamigrene                         | -5.2                             | TYR32 LYS47 TYR129 ASN138 SER709 THR710 ASP711 LYS714 LYS780                   |
| 2-bromospironippol                                      | -5.2                             | TYR32 ALA46 LYS47 TYR129 SER709 THR710 ASP711                                  |
| (3Z)-laurenyne                                          | -5                               | ALA46 LYS47 TYR129 HIS133 ASN138 SER709 THR710 ASP711 LYS780 ASN781            |
| 3,4-epoxypalisadin B                                    | -5.5                             | TYR32 ALA46 LYS47 PHE48 TYR129 SER709 THR710 ASP711 LYS714 GLN773 GLY774       |
| 3,7-dihydroxydihydrolaurene                             | -5.7                             | TYR32 ALA46 LYS47 PHE48 LEU49 TYR129 SER709 THR710 ASP711 LYS714 GLN773 GLY774 |

|                               |      |                                                                                                                                                   |
|-------------------------------|------|---------------------------------------------------------------------------------------------------------------------------------------------------|
| 3 alpha-Hydroxydebromoaplysin | -5.7 | ALA46 LYS47 TYR129 HIS133 SER709 THR710 ASP711 LYS780 ASN781 SER784<br>ALA46 LYS47 TYR129 ALA706 SER709 THR710 ASP711 ALA771 SER772 GLN773 GLY774 |
| 3 beta-Hydroperoxyaplysin     | -5.7 | LEU775 VAL776 ALA777 SER778 LYS780 ASN781                                                                                                         |
| 4-Hydroxy-1,8-epi-isotenerone | -5.5 | ALA46 LYS47 TYR129 SER709 THR710 ASP711 LYS714 GLN773 GLY774 LYS780                                                                               |
| 4-hydroxypalisidin C          | -5.7 | TYR32 ALA46 LYS47 TYR129 ASN138 SER709 ASP711 LYS714 LYS780                                                                                       |
| 5-acetoxyoachamigrene         | -5.5 | TYR32 ALA46 LYS47 TYR129 ALA706 SER709 THR710 ASP711 LYS714 GLN773 GLY774                                                                         |
| 5-epi-maneolactone            | -5.1 | TYR32 ALA46 LYS47 PHE48 TYR129 SER709 THR710 ASP711 GLN773 LYS780                                                                                 |
| 7-acetyl-aplysiol             | -5.8 | TYR32 ALA46 LYS47 TYR129 HIS133 SER709 THR710 ASP711 LYS780 ASN781                                                                                |
| 7-hydroxylaurene              | -5.2 | TYR32 ALA46 LYS47 PHE48 SER709 THR710 ASP711 LYS714                                                                                               |
| 8,10-dibromoisoplysin         | -5.5 | TYR32 ALA46 LYS47 TYR129 SER709 THR710 ASP711 LYS714 SER772 GLN773                                                                                |
| 9-Deoxyelatol                 | -5   | TYR32 ALA46 LYS47 TYR129 SER709 THR710 ASP711 LYS714                                                                                              |
| 10-Bromo-beta-chamigrene      | -5.2 | TYR32 ALA46 LYS47 PHE48 TYR129 SER709 THR710 ASP711 LYS714 GLY774<br>ALA46 LYS47 TYR129 ALA706 SER709 THR710 ASP711 ALA771 SER772 GLN773 GLY774   |
| 10-Bromosoplyin               | -5   | SER778 LYS780 ASN781                                                                                                                              |
| 10-hydroxyisolaurene          | -5.5 | TYR32 ALA46 LYS47 TYR129 SER709 THR710 ASP711 SER772 GLN773 GLY774                                                                                |
| 10-Hydroxyaplysin             | -5.2 | TYR32 ALA46 LYS47 PHE48 TYR129 SER709 THR710 ASP711 LYS714 GLY774 LYS780 ASN781                                                                   |
| 12-hydroxy Isolaurene         | -5.2 | TYR32 ALA46 LYS47 PHE48 TYR129 ALA706 SER709 THR710 ASP711<br>TYR32 ALA46 LYS47 TYR129 HIS133 ASN705 ALA706 LEU707 SER709 THR710 ASP711           |
| 12-Hydroxypalisadin B         | -5.7 | GLY774 LYS780 ASN781<br>TYR32 ALA46 LYS47 TYR129 ALA706 LEU707 SER709 THR710 ASP711 GLN773 GLY774                                                 |
| 15-Hydroxylaurene             | -5.2 | LEU775 ASN781                                                                                                                                     |
| 15-Oxolaurene                 | -5   | TYR32 ALA46 LYS47 TYR129 ALA706 SER709 THR710 ASP711 GLY774 LYS780 ASN781                                                                         |
| Almadioxide                   | -5.7 | TYR32 ALA46 LYS47 TYR129 SER709 THR710 ASP711 LYS714 SER772 GLN773 GLY774                                                                         |
| Aromadendrene                 | -5   | TYR32 LYS47 PHE48 TYR129 SER709 THR710 ASP711 LYS714<br>ASN705 ALA706 SER709 THR710 ASP711 ALA771 SER772 GLN773 GLY774 VAL776 SER778              |
| Aldingenin A                  | -5.5 | LYS780 ASN781                                                                                                                                     |
| Aldingenin B                  | -5.7 | TYR32 ALA46 LYS47 TYR129 ASN138 SER709 THR710 ASP711                                                                                              |



|                        |      |                                                                                                                                                              |
|------------------------|------|--------------------------------------------------------------------------------------------------------------------------------------------------------------|
| Aldingenin C           | -5.9 | TYR32 ALA46 LYS47 TYR129 ALA706 SER709 THR710 ASP711 LYS714 SER772 GLN773<br>GLY774 LYS780                                                                   |
| Allolaurinterol        | -5.5 | TYR32 ALA46 LYS47 PHE48 TYR129 ASN138 SER709 THR710 ASP711 LYS714 LYS780                                                                                     |
| Allolaurinterolacetate | -5.7 | TYR32 ALA46 LYS47 PHE48 TYR129 HIS133 SER709 THR710 ASP711 GLN773 GLY774 LYS780<br>PHE45 ALA46 LYS47 TYR129 HIS133 ALA706 SER709 THR710 ASP711 GLY774 LYS780 |
| Aplysinal              | -5.5 | ASN781                                                                                                                                                       |
| Aristolan-8-en-1-one   | -5.5 | TYR32 ALA46 LYS47 TYR129 SER709 THR710 ASP711 LYS714 LYS780                                                                                                  |
| Aristolane             | -5   | TYR32 ALA46 LYS47 TYR129 SER709 THR710 ASP711 LYS714 GLN773 GLY774                                                                                           |
| AxinysonB              | -5.9 | ALA46 LYS47 TYR129 HIS133 SER709 THR710 ASP711 LYS714 GLN773 LYS780                                                                                          |
| Apysiol-7-one          | -5   | TYR32 ALA46 LYS47 PHE48 TYR129 ASN138 SER709 THR710 ASP711 LYS714 LYS780                                                                                     |
| Apysiolic acid         | -5.9 | TYR32 ALA46 LYS47 TYR129 HIS133 SER709 THR710 ASP711 LYS780 ASN781                                                                                           |
| (-)-BisezakyneA        | -5.5 | TYR32 LYS47 TYR129 ALA706 SER709 THR710 ASP711 LYS714 GLY774 LYS780 ASN781                                                                                   |
| Brasilanol             | -5   | TYR32 ALA46 LYS47 PHE48 TYR129 ASN138 SER709 ASP711 LYS780                                                                                                   |
| Bromocuparene          | -5   | TYR32 ALA46 LYS47 TYR129 ASN138 SER709 THR710 ASP711 LYS714 GLN773<br>ALA46 LYS47 TYR129 ASN705 ALA706 SER709 THR710 ASP711 GLY774 VAL776 SER778             |
| Bromocyclococanol      | -5.2 | LYS780 ASN781<br>TYR32 ALA46 LYS47 PHE48 TYR129 HIS133 ASN138 SER709 THR710 ASP711 LYS714 GLN773                                                             |
| Bosseopentanoic acid   | -5   | GLY774 LYS780 ASN781<br>TYR32 ALA46 LYS47 TYR129 HIS133 ALA706 SER709 THR710 ASP711 LYS714 GLN773 GLY774                                                     |
| Bromlaurenidificin     | -5.1 | LYS780 ASN781<br>TYR32 ALA46 LYS47 TYR129 ALA706 SER709 THR710 ASP711 ALA771 SER772 GLN773                                                                   |
| Caespitane             | -5.7 | GLY774 VAL776 SER778 LYS780 ASN781<br>TYR32 ALA46 LYS47 TYR129 HIS133 ALA706 SER709 THR710 ASP711 LYS714 GLN773 GLY774                                       |
| Caesspitenone          | -5.2 | LYS780 ASN781                                                                                                                                                |
| Cycloeudesmol          | -5   | TYR32 ALA46 LYS47 TYR129 SER709 THR710 ASP711<br>TYR129 HIS133 ALA706 SER709 THR710 ALA771 SER772 GLN773 GLY774 VAL776 SER778                                |
| Cyclolaurenol          | -5.5 | LYS780 ASN781 SER78                                                                                                                                          |

|                         |      |                                                                                                                                                                                  |
|-------------------------|------|----------------------------------------------------------------------------------------------------------------------------------------------------------------------------------|
| Callophycoic acid F     | -5.8 | TYR32 ALA46 LYS47 TYR129 HIS133 SER709 THR710 ASP711 LYS714 SER772 GLN773 GLY774<br>LYS780 ASN781<br>LYS47 TYR129 HIS133 ALA706 SER709 THR710 ASP711 LYS714 SER772 GLN773 GLY774 |
| Callenzanol             | -5.5 | LYS780 ASN781                                                                                                                                                                    |
| Chamigrene epoxide      | -5.4 | TYR32 ALA46 LYS47 TYR129 ASN138 SER709 THR710 ASP711 LYS714 LYS780                                                                                                               |
| Chinzallene             | -5.7 | LYS47 TYR129 ALA130 HIS133 ASN138 SER709 THR710 LYS780 ASN781 SER784                                                                                                             |
| Compositacin A          | -5.5 | TYR32 ALA46 LYS47 TYR129 ASN138 SER709 THR710 ASP711 LYS714 LYS780                                                                                                               |
| Compositacin C          | -5.9 | TYR32 ALA46 LYS47 PHE48 LEU49 TYR129 SER709 THR710 ASP711 LYS714                                                                                                                 |
| Compositacin D          | -5.7 | TYR32 ALA46 LYS47 PHE48 TYR129 SER709 THR710 ASP711 LYS714 GLN773 GLY774 LYS780                                                                                                  |
| Compositacin G          | -5.5 | TYR32 LYS47 PHE48 TYR129 ALA706 SER709 THR710 ASP711 LYS714 GLY774 LYS780<br>LYS47 TYR129 ALA706 SER709 THR710 ASP711 ALA771 SER772 GLN773 GLY774 SER778                         |
| Compositacin H          | -5.5 | LYS780 ASN781                                                                                                                                                                    |
| Compositacin J          | -5.9 | TYR32 ALA46 LYS47 PHE48 TYR129 SER709 THR710 ASP711 LYS714 SER772 GLN773 GLY774<br>TYR129 HIS133 ALA706 SER709 THR710 ALA771 SER772 GLN773 GLY774 SER778 LYS780                  |
| Compositacin K          | -5.7 | ASN781                                                                                                                                                                           |
| Compositacin L          | -5.7 | TYR32 ALA46 LYS47 TYR129 SER709 THR710 ASP711 LYS714 GLN773<br>LYS47 TYR129 HIS133 ASN705 ALA706 SER709 THR710 GLN773 GLY774 SER778 LYS780                                       |
| Compositacin M          | -5.5 | ASN781                                                                                                                                                                           |
| Cycloelatanene A        | -5.5 | TYR32 ALA46 LYS47 PHE48 TYR129 SER709 THR710 ASP711 LYS714 GLN773 LYS780                                                                                                         |
| Cycloelatanene B        | -5.7 | TYR32 ALA46 LYS47 TYR129 SER709 THR710 ASP711 LYS714 GLN773 GLY774                                                                                                               |
| Cycloisoallolaurinterol | -5.5 | TYR32 ALA46 LYS47 TYR129 ASN138 SER709 THR710 ASP711 LYS714                                                                                                                      |
| Chlorofucin             | -5.5 | TYR32 ALA46 LYS47 TYR129 SER709 THR710 ASP711 LYS714 GLN773                                                                                                                      |
| Cupalaurenol            | -5.5 | TYR32 ALA46 LYS47 PHE48 TYR129 SER709 THR710 ASP711 LYS714 GLN773                                                                                                                |
| Dactylyne               | -5   | TYR32 ALA46 LYS47 TYR129 ASN138 SER709 THR710 ASP711 LYS714 LYS780                                                                                                               |
| Debromoaplysin          | -5.2 | TYR129 HIS133 ALA706 SER709 THR710 ASP711 GLN773 GLY774 LYS780 ASN781 SER784                                                                                                     |
| Debromoepiaplysinol     | -5.7 | TYR32 ALA46 LYS47 TYR129 SER709 THR710 ASP711 LYS714 GLN773 GLY774                                                                                                               |
| Debromolaurinterol      | -5.2 | TYR32 ALA46 LYS47 TYR129 SER709 THR710 ASP711 LYS714 GLN773                                                                                                                      |

|                           |      |                                                                                                                                                                |
|---------------------------|------|----------------------------------------------------------------------------------------------------------------------------------------------------------------|
| Debromolaurinterolacetate | -5.7 | ALA46 LYS47 TYR129 HIS133 ALA706 SER709 THR710 ASP711 GLN773 GLY774 LYS780<br>ASN781 SER784                                                                    |
| Dendroidiol               | -5.2 | TYR32 ALA46 LYS47 PHE48 LEU49 TYR129 SER709 THR710 ASP711 LYS714 LYS780                                                                                        |
| Dendroidone               | -5.7 | TYR32 ALA46 LYS47 TYR129 ALA706 SER709 THR710 ASP711 LYS714 GLY774 ASN781                                                                                      |
| Deoxyprepacifenol         | -5.7 | TYR32 ALA46 LYS47 TYR129 SER709 THR710 ASP711 LYS714 SER772 GLN773 GLY774                                                                                      |
| Deschloroelatol           | -5.2 | TYR32 ALA46 LYS47 PHE48 TYR129 SER709 THR710 ASP711 LYS714<br>TYR32 ALA46 LYS47 TYR129 ALA706 SER709 THR710 ASP711 GLN773 GLY774 LYS780                        |
| Elatenyne                 | -5.5 | ASN781                                                                                                                                                         |
| Elatol                    | -5.7 | TYR32 ALA46 LYS47 TYR129 ASN138 SER709 THR710 ASP711 LYS714 LYS780<br>LYS47 TYR129 HIS133 ASP135 ASN138 SER709 THR710 ASP711 GLN773 GLY774 LYS780              |
| Epiaplysinol              | -5.5 | ASN781 SER784<br>LYS47 TYR129 HIS133 ASN138 ALA706 SER709 THR710 GLY774 SER778 LYS780 ASN781                                                                   |
| Epibrasilenol             | -5.2 | SER784<br>TYR129 HIS133 ALA706 SER709 THR710 ASP711 ALA771 GLN773 GLY774 LEU775 VAL776                                                                         |
| Floridoside               | -5.5 | ALA777 SER778 LYS780 ASN781<br>LYS47 TYR129 HIS133 ASN138 ALA706 SER709 THR710 GLN773 GLY774 VAL776 SER778                                                     |
| Filiformin                | -5.7 | LYS780 ASN781<br>TYR32 ALA46 LYS47 PHE48 TYR129 ALA706 SER709 THR710 ASP711 LYS714 GLN773 GLY774                                                               |
| Filiforminol              | -5.7 | LYS780 ASN781<br>ALA46 LYS47 TYR129 HIS133 ALA706 SER709 THR710 ASP711 ALA771 SER772 GLN773                                                                    |
| Guimarediol               | -5.5 | GLY774 VAL776 SER778 LYS780 ASN781                                                                                                                             |
| Heterocladol              | -5.2 | TYR32 ALA46 LYS47 PHE48 TYR129 SER709 THR710 ASP711 LYS780                                                                                                     |
| Intricenynne              | -5.5 | TYR32 ALA46 LYS47 TYR129 SER709 THR710 ASP711 LYS714 ILE715 ALA716 GLN773 LEU775<br>ALA46 LYS47 TYR129 HIS133 ALA706 SER709 THR710 ASP711 LYS714 GLY774 LYS780 |
| Isocaesitol               | -5.7 | ASN781                                                                                                                                                         |
| Isodihydrolaurene         | -5.2 | TYR32 ALA46 LYS47 SER709 THR710 ASP711 LYS714                                                                                                                  |
| Isolaurallene             | -5.5 | TYR32 ALA46 LYS47 TYR129 ALA130 HIS133 ASN138 SER709 ASP711 LYS780                                                                                             |
| Isolaureatin              | -5.5 | TYR32 ALA46 LYS47 TYR129 SER709 THR710 ASP711 LYS714 LYS780                                                                                                    |

|                       |      |                                                                                                                                                                  |
|-----------------------|------|------------------------------------------------------------------------------------------------------------------------------------------------------------------|
| Isolaurene            | -5   | TYR32 ALA46 LYS47 TYR129 SER709 THR710 ASP711 SER772 GLN773 GLY774<br>ALA46 LYS47 TYR129 HIS133 ASN705 ALA706 SER709 THR710 ASP711 GLN773 GLY774                 |
| ItomanindoleA         | -5.2 | LYS780 ASN781<br>TYR129 ALA706 SER709 THR710 ASP711 LYS714 ALA771 SER772 GLN773 GLY774 VAL776                                                                    |
| Isolaurenidificin     | -5.3 | SER778 LYS780 ASN781                                                                                                                                             |
| Isoafricanol          | -5.2 | TYR32 ALA46 LYS47 TYR129 SER709 THR710 ASP711 LYS714 LYS780                                                                                                      |
| Isoallolaurinterol    | -5.7 | TYR32 ALA46 LYS47 TYR129 SER709 THR710 ASP711 LYS714 GLN773 GLY774 LYS780<br>TYR129 HIS133 ALA706 SER709 THR710 ALA771 SER772 GLN773 GLY774 SER778 LYS780        |
| Isoaplysin            | -5.2 | ASN781 SER784                                                                                                                                                    |
| Isodactyloxene A      | -5   | TYR32 ALA46 LYS47 TYR129 SER709 THR710 ASP711 LYS714                                                                                                             |
| Isodebromolaurinterol | -5.5 | TYR32 ALA46 LYS47 TYR129 SER709 THR710 ASP711 LYS714 GLN773 GLY774                                                                                               |
| Isolaurenisol         | -5.2 | TYR32 ALA46 LYS47 TYR129 HIS133 SER709 THR710 ASP711 LYS714 GLN773 GLY774                                                                                        |
| Isoobtusol            | -5.5 | TYR32 ALA46 LYS47 TYR129 ASN138 SER709 THR710 ASP711 LYS714<br>TYR32 ALA46 LYS47 TYR129 ALA706 SER709 THR710 ASP711 LYS714 GLN773 GLY774                         |
| Isopalisol            | -5   | ASN781<br>TYR32 ALA46 LYS47 PHE48 TYR129 HIS133 ALA706 SER709 THR710 ASP711 GLN773 GLY774                                                                        |
| Isorigidol            | -5.5 | LYS780 ASN781<br>TYR32 ALA46 LYS47 TYR129 SER709 THR710 ASP711 LYS714 ILE715 ALA716 GLN773                                                                       |
| Kumausallene          | -5   | LEU775                                                                                                                                                           |
| Laurallene            | -5   | TYR32 ALA46 LYS47 TYR129 ALA706 SER709 THR710 ASP711 LYS714 ILE715 GLN773 GLY774                                                                                 |
| Laureacetal A         | -5.2 | TYR32 ALA46 LYS47 TYR129 SER709 THR710 ASP711 LYS714 SER772 GLN773 GLY774                                                                                        |
| Laureacetal B         | -5.5 | TYR32 ALA46 LYS47 TYR129 HIS133 SER709 THR710 ASP711 LYS714 GLY774 LYS780 ASN781<br>TYR129 HIS133 ASN138 ASN705 ALA706 SER709 THR710 ASP711 ALA771 GLN773 GLY774 |
| Laurefurenyne A       | -5.7 | SER778 LYS780 ASN781                                                                                                                                             |
| Laurefurenyne C       | -5.2 | TYR32 LYS47 TYR129 ALA706 SER709 THR710 ASP711 LYS714 GLN773 LYS780                                                                                              |
| Laurefurenyne D       | -5.5 | TYR32 ALA46 LYS47 PHE48 TYR129 SER709 THR710 ASP711 LYS714 ILE715 GLN773 LYS780                                                                                  |
| Laurefurenyne E       | -5.5 | TYR32 ALA46 LYS47 TYR129 SER709 THR710 ASP711 SER772 GLN773 GLY774                                                                                               |
| Laurefurenyne F       | -5.7 | TYR32 ALA46 LYS47 TYR129 SER709 THR710 ASP711 LYS714 ILE715 GLN773                                                                                               |

|                     |      |                                                                                                                                                               |
|---------------------|------|---------------------------------------------------------------------------------------------------------------------------------------------------------------|
| Laurencial          | -5.2 | ASN705 ALA706 SER709 THR710 ASP711 LYS714 ALA771 SER772 GLN773 GLY774 LYS780<br>ASN781                                                                        |
| Laurendecumallene A | -5.5 | TYR32 LYS47 TYR129 HIS133 ASN138 SER709 THR710 ASP711 LYS714 GLN773 GLY774<br>LYS780 ASN781                                                                   |
| Laurendecumallene B | -5.5 | LYS47 TYR129 HIS133 ASN138 ALA706 LEU707 SER709 THR710 ASP711 GLN773 GLY774<br>LEU775 VAL776 SER778 LYS780 ASN781                                             |
| Laurendecumenyne A  | -5.7 | TYR32 ALA46 LYS47 TYR129 SER709 THR710 ASP711 LYS714 GLN773 GLY774<br>TYR32 ALA46 LYS47 TYR129 ALA706 SER709 THR710 ASP711 LYS714 GLN773 GLY774               |
| Laurendecumenyne B  | -5.5 | LYS780 ASN781                                                                                                                                                 |
| Laurenenyne         | -5.5 | TYR32 ALA46 LYS47 TYR129 HIS133 ALA706 SER709 THR710 ASP711 SER778 LYS780 ASN781<br>TYR32 ALA46 LYS47 TYR129 ALA706 SER709 THR710 ASP711 GLN773 GLY774 LYS780 |
| Laurenisol          | -5.2 | ASN781                                                                                                                                                        |
| Laurenone A         | -5.2 | TYR32 LYS47 TYR129 HIS133 ASN138 SER709 ASP711 LYS780                                                                                                         |
| Laureoxanyne        | -5.2 | ALA46 LYS47 TYR129 HIS133 SER709 THR710 ASP711 LYS780 ASN781 SER784                                                                                           |
| Laurecomin B        | -5.2 | TYR32 ALA46 LYS47 PHE48 TYR129 SER709 THR710 ASP711 LYS714 GLN773                                                                                             |
| Laurecomin C        | -5.2 | TYR32 LYS47 PHE48 TYR129 ASN138 SER709 THR710 ASP711 GLN773                                                                                                   |
| Laurencomposidiene  | -5.2 | TYR32 ALA46 LYS47 PHE48 TYR129 SER709 THR710 ASP711 LYS714 LYS780                                                                                             |
| Laurene             | -5.5 | TYR32 ALA46 LYS47 SER709 THR710 ASP711 LYS714 GLN773<br>ALA46 LYS47 TYR129 ALA706 SER709 THR710 ASP711 ALA771 SER772 GLN773 GLY774                            |
| Laurentristich-4-ol | -5.5 | VAL776 SER778 LYS780 ASN781                                                                                                                                   |
| Laureperoxide       | -5.7 | TYR32 ALA46 LYS47 TYR129 SER709 THR710 ASP711 LYS714 SER772 GLN773<br>ALA46 LYS47 TYR129 ALA706 SER709 THR710 ASP711 ALA771 GLN773 GLY774 SER778              |
| Laurokamurene A     | -5.5 | LYS780 ASN781                                                                                                                                                 |
| Laurokamurene B     | -5   | TYR32 ALA46 LYS47 TYR129 ASN138 SER709 THR710 ASP711                                                                                                          |
| Laurokamurene C     | -5.5 | TYR32 ALA46 LYS47 TYR129 HIS133 SER709 THR710 ASP711 GLY774 LYS780 ASN781<br>TYR32 ALA46 LYS47 TYR129 HIS133 ASN138 ALA706 SER709 THR710 ASP711 GLY774 LYS780 |
| Laurokamurene D     | -5.5 | ASN781                                                                                                                                                        |
| Luzofuran           | -5.5 | TYR32 ALA46 LYS47 PHE48 TYR129 SER709 THR710 ASP711 LYS714 GLN773 GLY774                                                                                      |

|                      |      |                                                                                                                                                                                                     |
|----------------------|------|-----------------------------------------------------------------------------------------------------------------------------------------------------------------------------------------------------|
| Luzonenone           | -5.5 | ALA46 LYS47 TYR129 HIS133 ASN705 ALA706 SER709 THR710 ASP711 ALA771 SER772<br>GLY774 SER778 LYS780 ASN781                                                                                           |
| Luzonensol           | -5.2 | TYR32 ALA46 LYS47 TYR129 HIS133 ALA706 SER709 THR710 ASP711 LYS714 GLY774 ASN781<br>TYR32 ALA46 LYS47 TYR129 HIS133 ASN705 ALA706 SER709 THR710 ASP711 LYS714 SER778<br>LYS780 ASN781 SER784        |
| Luzonensolacetate    | -5.5 | TYR32 ALA46 LYS47 TYR129 ALA130 HIS133 ASN138 SER709 THR710 ASP711 LYS780                                                                                                                           |
| Laurepinnacin        | -5.5 | TYR32 ALA46 LYS47 PHE48 TYR129 ASN138 SER709 THR710 ASP711 LYS714 LYS780                                                                                                                            |
| Laurinterol          | -5.4 | TYR32 ALA46 LYS47 PHE48 TYR129 HIS133 ASN138 SER709 THR710 ASP711 LYS714 LYS780                                                                                                                     |
| Ma'iliohydrin        | -5.7 | TYR129 ALA706 SER709 THR710 ASP711 ALA771 SER772 GLN773 GLY774 SER778 LYS780                                                                                                                        |
| Mailione             | -5.2 | ASN781<br>LYS47 ASP126 TYR129 ALA130 HIS133 PHE134 ASP135 ASN138 CYS139 ASP140 THR141<br>LEU142 SER709 LYS780                                                                                       |
| Majapolene B         | -5.5 | ALA46 LYS47 TYR129 HIS133 ALA706 SER709 THR710 ASP711 GLN773 GLY774 SER778                                                                                                                          |
| Microcladallene A    | -5.5 | LYS780 ASN781 SER784<br>ALA46 LYS47 TYR129 HIS133 ALA706 SER709 THR710 ASP711 GLN773 GLY774 SER778                                                                                                  |
| Microcladallene B    | -5.5 | LYS780 ASN781 SER784<br>ALA46 LYS47 TYR129 HIS133 ALA706 SER709 THR710 ASP711 ALA771 GLY774 SER778                                                                                                  |
| Microcladallene C    | -5.2 | LYS780 ASN781 SER784                                                                                                                                                                                |
| Neoisoprelaurefucin  | -5.2 | TYR32 ALA46 LYS47 TYR129 SER709 THR710 ASP711 LYS714 ILE715 SER772 GLN773<br>TYR32 ALA46 LYS47 TYR129 ALA706 SER709 THR710 ASP711 LYS714 SER772 GLN773                                              |
| Neolaurallene        | -5.5 | GLY774 ASN781<br>TYR32 ALA46 LYS47 TYR129 ALA706 SER709 THR710 ASP711 GLN773 GLY774 LYS780                                                                                                          |
| Nidificene           | -5.2 | ASN781                                                                                                                                                                                              |
| Notoryne             | -5.5 | TYR32 ALA46 LYS47 TYR129 HIS133 SER709 THR710 ASP711 LYS780 ASN781 SER784<br>TYR32 ALA46 LYS47 TYR129 ALA130 HIS133 PHE134 ASP135 ASN138 CYS139 ASP140<br>THR141 LEU142 SER709 THR710 ASP711 LYS780 |
| Octadecanedioic acid | -5.1 | THR141 LEU142 SER709 THR710 ASP711 LYS780                                                                                                                                                           |
| Obtusane             | -5.2 | TYR32 ALA46 LYS47 TYR129 ALA706 SER709 THR710 ASP711 GLY774 LYS780 ASN781                                                                                                                           |
| Okamurene A          | -5.5 | TYR32 ALA46 LYS47 SER709 THR710 ASP711 LYS714 GLN773 GLY774                                                                                                                                         |

|                         |      |                                                                                                                                                 |
|-------------------------|------|-------------------------------------------------------------------------------------------------------------------------------------------------|
| Okamurene B             | -5.5 | ALA46 LYS47 TYR129 HIS133 SER709 THR710 ASP711 LYS780 ASN781 SER784                                                                             |
| Okamurene C             | -5.2 | TYR32 LYS47 TYR129 SER709 THR710 ASP711 LYS714 GLN773<br>TYR129 HIS133 ASN138 ALA706 SER709 THR710 ALA771 GLN773 GLY774 SER778 LYS780           |
| Okamurene D             | -5.5 | ASN781 SER784                                                                                                                                   |
| Okamurene E             | -5.5 | TYR32 ALA46 LYS47 TYR129 ASN138 SER709 THR710 ASP711 LYS714 LYS780<br>TYR32 ALA46 LYS47 TYR129 ALA130 HIS133 PHE134 ASP135 ASN138 CYS139 THR141 |
| Omaezallene             | -5.2 | LEU142 SER709 THR710 ASP711 LYS714 LYS780                                                                                                       |
| Oxachamigrene           | -5.5 | TYR32 ALA46 LYS47 TYR129 SER709 THR710 ASP711 LYS714                                                                                            |
| Palisadin A             | -5.6 | TYR32 ALA46 LYS47 PHE48 TYR129 SER709 THR710 ASP711 LYS714 GLN773 GLY774                                                                        |
| Palisadin B             | -5.5 | TYR32 ALA46 LYS47 TYR129 ASN138 SER709 THR710 ASP711 LYS714 LYS780<br>TYR32 ALA46 LYS47 TYR129 ALA706 SER709 THR710 ASP711 LYS714 SER772 GLN773 |
| Palisadin C             | -5.7 | GLY774 ASN781                                                                                                                                   |
| Pannosane               | -5.3 | TYR32 ALA46 LYS47 TYR129 SER709 THR710 ASP711 LYS714 GLN773 GLY774 LYS780                                                                       |
| Pannosanol              | -5.5 | TYR32 ALA46 LYS47 TYR129 SER709 THR710 ASP711 LYS714 GLN773 GLY774 LYS780                                                                       |
| Perforatone             | -5.5 | TYR32 ALA46 LYS47 TYR129 SER709 THR710 ASP711 LYS714 GLN773 LYS780                                                                              |
| Perforenol              | -5.5 | TYR32 ALA46 LYS47 TYR129 SER709 THR710 ASP711 LYS714 GLN773 LYS780                                                                              |
| Prepacifenol            | -5.7 | TYR32 ALA46 LYS47 TYR129 SER709 THR710 ASP711 LYS714 SER772 GLN773 GLY774 LYS780                                                                |
| Prelaureatin            | -5.5 | TYR32 ALA46 LYS47 TYR129 SER709 THR710 ASP711 LYS714 GLN773                                                                                     |
| Rhodophytin             | -5   | TYR32 LYS47 TYR129 SER709 THR710 ASP711 LYS714 GLN773 LYS780                                                                                    |
| Scopariol               | -5.5 | TYR32 ALA46 LYS47 PHE48 TYR129 HIS133 SER709 THR710 ASP711 LYS780                                                                               |
| Seco-Laurokamurone      | -5.5 | TYR32 ALA46 LYS47 TYR129 HIS133 SER709 THR710 ASP711 GLN773 GLY774 LYS780 ASN781                                                                |
| Spirolaurenone          | -5.7 | TYR32 LYS47 TYR129 ASN138 SER709 THR710 ASP711 LYS714 GLN773                                                                                    |
| Trans-Deacetylkumausyne | -5   | TYR32 ALA46 LYS47 TYR129 HIS133 ASN138 SER709 ASP711 LYS714 LYS780                                                                              |
| Trans-Kumausyne         | -5.2 | TYR32 LYS47 PHE48 TYR129 ASN138 SER709 THR710 ASP711 LYS714 GLN773 LYS780                                                                       |

**Table S3:** Natural products listed under subcategory 2 in low class for RdRp

## RDRP N-Terminal

| Ligands                                | Binding affinity ('-6.0 to -6.9) | Interacting amino acids                                                                                                                                                                            |
|----------------------------------------|----------------------------------|----------------------------------------------------------------------------------------------------------------------------------------------------------------------------------------------------|
| 1,2-Dehydro-3,4-epoxypalisadin B       | -6.5                             | ALA46 LYS47 TYR129 HIS133 ALA706 SER709 THR710 ASP711 ALA771 GLY774 SER778 LYS780 ASN781 SER784                                                                                                    |
| 2-Hydroxyluzofuranone A                | -6.2                             | TYR32 ALA46 LYS47 PHE48 TYR129 ALA706 SER709 THR710 ASP711 SER772 GLN773 GLY774 ASN781                                                                                                             |
| 2-Hydroxyluzofuranone B                | -6.2                             | TYR129 HIS133 ASN705 ALA706 SER709 THR710 ALA771 SER772 GLN773 GLY774 LYS780 ASN781 SER784<br>ALA46 LYS47 TYR129 ALA706 SER709 THR710 ASP711 ALA771 SER772 GLN773 GLY774 VAL776 SER778 LYS780      |
| 3 alpha-hydroperoxy-3-epiaplysin       | -6                               | ASN781<br>ALA46 LYS47 TYR129 HIS133 ALA706 LEU707 SER709 THR710 ASP711 LYS714 ALA771 GLN773 GLY774 LEU775                                                                                          |
| 3-Bromo-4, 5-dihydroxybenzaldehyde     | -6.1                             | VAL776 SER778 LYS780 ASN781                                                                                                                                                                        |
| 3-Bromobarekoxide                      | -6                               | TYR32 ALA46 LYS47 TYR129 SER709 THR710 ASP711 LYS714 SER772 GLN773 GLY774                                                                                                                          |
| 3-Epi-PerforenoneA                     | -6                               | TYR32 ALA46 LYS47 TYR129 SER709 THR710 ASP711 LYS714                                                                                                                                               |
| 3R,4S-luzonolone                       | -6                               | TYR32 ALA46 LYS47 TYR129 HIS133 ASN705 ALA706 SER709 THR710 GLY774 LYS780 ASN781 SER784                                                                                                            |
| 3S, 4R-luzonolone                      | -6                               | TYR32 LYS47 TYR129 ASN705 ALA706 LEU707 SER709 THR710 ASP711 GLN773 GLY774 SER778 LYS780 ASN781<br>ALA46 LYS47 TYR129 HIS133 ASN138 ALA706 SER709 THR710 ASP711 ALA771 GLY774 SER778 LYS780 ASN781 |
| 5-acetoxypalisadin B                   | -6.1                             | SER784                                                                                                                                                                                             |
| 5alpha-Hydroxyaplystatin               | -6.2                             | TYR32 ALA46 LYS47 PHE48 TYR129 SER709 THR710 ASP711 LYS714 GLN773 GLY774                                                                                                                           |
| 9-hydroxy-3-epi-perforenone A          | -6.2                             | ALA46 LYS47 TYR129 HIS133 ALA706 SER709 THR710 ASP711 SER772 GLN773 GLY774 LYS780 ASN781<br>TYR32 LYS47 PHE48 LEU49 TYR129 HIS133 ALA706 SER709 THR710 ASP711 LYS714 ALA771 GLN773 GLY774 SER778   |
| 11,14-dihydroaplysia-5,11,14,15-Tetrol | -6.9                             | LYS780 ASN781                                                                                                                                                                                      |
| 15-hydroxypalisadin A                  | -6.2                             | ALA46 LYS47 TYR129 HIS133 ALA706 SER709 THR710 ASP711 LYS714 GLN773 GLY774 LYS780 ASN781<br>TYR32 ALA46 LYS47 PHE48 TYR129 HIS133 ALA706 SER709 THR710 ASP711 ALA771 SER772 GLY774 VAL776 ALA777   |
| Acetylmajapolene A                     | -6.5                             | SER778 LYS780 ASN781                                                                                                                                                                               |
| Acetylmajapolene B                     | -6.2                             | ALA46 LYS47 TYR129 ALA130 HIS133 ASN138 CYS139 ASP140 THR141 LEU142 SER709 THR710 ASP711 LYS780                                                                                                    |
| Aldingenin D                           | -6                               | TYR32 LYS47 TYR129 HIS133 ALA706 SER709 THR710 ASP711 LYS714 LYS780 ASN781 SER784                                                                                                                  |
| Aplystatin                             | -6                               | TYR32 ALA46 LYS47 TYR129 ALA706 SER709 THR710 ASP711 LYS714 GLY774 LYS780                                                                                                                          |



|                       |      |                                                                                                                                                                                              |
|-----------------------|------|----------------------------------------------------------------------------------------------------------------------------------------------------------------------------------------------|
| Aristolan-10-ol-9-one | -6   | TYR129 ALA706 SER709 THR710 ASP711 ALA771 SER772 GLN773 GLY774 VAL776 SER778 LYS780 ASN781<br>TYR32 ALA46 LYS47 TYR129 ALA130 LEU131 HIS133 PHE134 ASP135 ASN138 CYS139 THR141 SER709 THR710 |
| Aplysiodiol           | -6.7 | ASP711 LYS780                                                                                                                                                                                |
| Barekoxide            | -6.5 | TYR32 ALA46 LYS47 TYR129 HIS133 ALA706 SER709 THR710 ASP711 GLN773 GLY774 LYS780 ASN781<br>TYR32 LYS47 TYR129 ALA706 SER709 THR710 ASP711 LYS714 ALA771 SER772 GLN773 GLY774 VAL776 SER778   |
| Beta-sitosterol       | -6.9 | LYS780 ASN781                                                                                                                                                                                |
| Bromophycolide G      | -6.7 | ASN705 ALA706 SER709 THR710 ASP711 LYS714 ALA771 SER772 GLN773 GLY774 SER778 LYS780 ASN781<br>TYR32 ALA46 LYS47 PHE48 TYR129 ALA706 SER709 THR710 ASP711 LYS714 ALA771 SER772 GLN773 GLY774  |
| Bromophycolide I      | -6.7 | VAL776 SER778 LYS780 ASN781                                                                                                                                                                  |
| Caespitol             | -6   | TYR32 ALA46 LYS47 TYR129 HIS133 ALA706 SER709 THR710 ASP711 LYS714 GLY774 LYS780 ASN781<br>TYR32 LYS47 TYR129 ASN705 ALA706 SER709 THR710 ASP711 LYS714 ALA771 SER772 GLN773 GLY774 SER778   |
| Callophycoic acid A   | -6.4 | LYS780 ASN781                                                                                                                                                                                |
| Callophycoic acid B   | -6.1 | LYS47 TYR129 ALA706 SER709 THR710 ASP711 LYS714 ALA771 SER772 GLN773 GLY774 SER778 LYS780 ASN781                                                                                             |
| Callophycoic acid G   | -6.7 | TYR32 LYS47 TYR129 HIS133 ASN138 SER709 THR710 ASP711 LYS714 LYS780 ASN781<br>TYR32 ALA46 LYS47 TYR129 HIS133 SER709 THR710 ASP711 LYS714 ALA771 SER772 GLN773 GLY774 SER778 LYS780          |
| Callophycoic acid H   | -6.7 | ASN781<br>TYR32 ALA46 LYS47 TYR129 HIS133 ASN138 ASN705 ALA706 LEU707 SER709 THR710 ASP711 ALA771 GLY774                                                                                     |
| Callophycoic acid I   | -6.9 | VAL776 SER778 LYS780 ASN781                                                                                                                                                                  |
| Callophycoic acid J   | -6.2 | TYR32 ALA46 LYS47 TYR129 ASN138 SER709 THR710 ASP711 LYS714 GLN773 GLY774 LYS780                                                                                                             |
| Callophycol A         | -6   | TYR32 LYS47 TYR129 ALA130 HIS133 ASN138 ALA706 SER709 THR710 ASP711 LYS714 GLY774 LYS780<br>TYR32 ALA46 LYS47 TYR129 ALA130 HIS133 ASN138 ALA706 SER709 THR710 ASP711 GLN773 GLY774 LYS780   |
| Callophycol B         | -6.2 | ASN781                                                                                                                                                                                       |
| Chamigrene Lactone    | -6.5 | TYR32 ALA46 LYS47 PHE48 TYR129 ASN138 SER709 THR710 ASP711 LYS714 LYS780                                                                                                                     |
| Compositacin B        | -6.2 | ALA46 LYS47 TYR129 SER709 THR710 ASP711 GLN773 GLY774                                                                                                                                        |
| Compositacin E        | -6   | TYR32 ALA46 LYS47 TYR129 HIS133 ASN138 SER709 THR710 ASP711 LYS780 ASN781                                                                                                                    |
| Compositacin F        | -6.2 | TYR32 ALA46 LYS47 TYR129 HIS133 ASN138 SER709 THR710 ASP711 LYS780 ASN781                                                                                                                    |
| Compositacin I        | -6.2 | TYR32 LYS47 TYR129 ALA706 SER709 THR710 ASP711 LYS714 GLY774 LYS780 ASN781                                                                                                                   |
| Compositacin N        | -6   | TYR129 HIS133 ALA706 SER709 THR710 ASP711 ALA771 SER772 GLN773 GLY774 VAL776 SER778 LYS780 ASN781                                                                                            |

|                        |      |                                                                                                                                   |
|------------------------|------|-----------------------------------------------------------------------------------------------------------------------------------|
| Cholest-4-en-3-one     | -6.5 | TYR32 LYS47 PHE48 TYR129 ASN138 ALA706 SER709 THR710 ASP711 LYS714 ALA771 SER772 GLN773 GLY774 VAL776 ALA777 SER778 LYS780 ASN781 |
| Cholest-5-en-3alpha-ol | -6.9 | TYR32 LYS47 PHE48 LEU49 TYR129 ALA706 SER709 THR710 ASP711 LYS714 ALA771 SER772 GLN773 GLY774 SER778 LYS780 ASN781                |
| Cholest-5-en-3beta-ol  | -6.7 | TYR32 LYS47 TYR129 ALA706 SER709 THR710 ASP711 LYS714 ALA771 SER772 GLN773 GLY774 VAL776 ALA777 SER778 LYS780 ASN781              |
| Debromoisocalenzanol   | -6   | TYR32 ALA46 LYS47 TYR129 SER709 THR710 ASP711 LYS714                                                                              |
| JaponenyneA            | -6   | LYS47 TYR129 ALA130 HIS133 ASP135 ASN138 THR141 SER709 THR710 GLN773 GLY774 SER778 LYS780 ASN781                                  |
| Johnstonol             | -6.2 | TYR32 ALA46 LYS47 TYR129 ASN138 SER709 THR710 ASP711 LYS780                                                                       |
| Laurecomin A           | -6   | TYR32 ALA46 LYS47 TYR129 HIS133 ALA706 SER709 THR710 ASP711 LYS714 GLY774 LYS780 ASN781                                           |
| Laurecomin D           | -6.2 | TYR32 ALA46 LYS47 PHE48 TYR129 ALA706 SER709 THR710 ASP711 LYS714 GLY774 LYS780                                                   |
| Laurenokomarin         | -6   | TYR32 ALA46 LYS47 TYR129 ASN138 SER709 THR710 ASP711 LYS780                                                                       |
| Laurepoxyene           | -6   | LYS47 TYR129 HIS133 ASN138 ASN705 ALA706 SER709 THR710 ALA771 GLY774 SER778 LYS780 ASN781                                         |
| Laureacetal C          | -6   | TYR129 HIS133 ALA706 SER709 THR710 ALA771 SER772 GLN773 GLY774 SER778 LYS780 ASN781 SER784                                        |
| Laurefurenyne B        | -6   | LYS47 TYR129 ALA130 HIS133 ASP135 ASN138 CYS139 THR141 LEU142 SER709 THR710 LYS780 ASN781                                         |
| Laurinterolacetate     | -6   | ALA46 LYS47 TYR129 HIS133 ASN138 ALA706 SER709 THR710 ASP711 GLN773 GLY774 LYS780 ASN781 SER784                                   |
| Luzondiol              | -6   | ALA46 LYS47 TYR129 HIS133 ALA706 SER709 THR710 ASP711 GLY774 LYS780 ASN781                                                        |
| Majapolene A           | -6.2 | TYR32 ALA46 LYS47 TYR129 HIS133 ASN705 ALA706 SER709 THR710 ASP711 LYS780 ASN781 SER784                                           |
| Oryzalexin S           | -6.5 | TYR32 ALA46 LYS47 TYR129 ASN138 SER709 THR710 ASP711 LYS714                                                                       |
| Pacifenol              | -6.2 | ALA46 LYS47 TYR129 ALA706 SER709 THR710 ASP711 LYS714 SER772 GLN773 GLY774 LYS780                                                 |
| Palisadin D            | -6.2 | ALA706 SER709 THR710 ASP711 ALA771 SER772 GLN773 GLY774 VAL776 ALA777 SER778 LYS780 ASN781                                        |
| Perforenone A          | -6   | TYR32 ALA46 LYS47 TYR129 SER709 THR710 ASP711 LYS714                                                                              |
| Saringosterol          | -6.9 | LYS47 TYR129 HIS133 PHE134 ASP135 ASN138 CYS139 SER709 THR710 ASP711 LYS714 ILE715 SER772 GLN773 GLY774 LYS780                    |
| Tiomanene              | -6.2 | TYR32 ALA46 LYS47 TYR129 ALA706 SER709 THR710 ASP711 ALA771 SER772 GLY774 SER778 LYS780 ASN781                                    |

**Table S4:** Natural products listed in lower-moderate class for RdRp

## RDRP N-Terminal

| Ligands                      | Binding affinity<br>( <sup>-</sup> 7.0 to <sup>-</sup> 7.9) | Interacting amino acids                                                                                                                                                                                                      |
|------------------------------|-------------------------------------------------------------|------------------------------------------------------------------------------------------------------------------------------------------------------------------------------------------------------------------------------|
| 5alpha-cholestane-3,6-dione  | -7                                                          | TYR32 LYS47 TYR129 ASN138 ALA706 SER709 THR710 ASP711 LYS714 ALA771 GLY774 VAL776 ALA777 SER778 LYS780 ASN781<br>TYR32 LYS47 PHE48 LEU49 TYR129 ASN138 ASN705 ALA706 SER709 THR710 ASP711 LYS714 ALA771 SER772 GLN773 GLY774 |
| 6-hydroxycholest-4-en-3-one  | -7.1                                                        | VAL776 ALA777 SER778 LYS780 ASN781                                                                                                                                                                                           |
| 10-acetoxyangasiol           | -7.4                                                        | TYR32 ALA46 LYS47 PHE48 TYR129 ALA706 SER709 THR710 ASP711 LYS714 SER772 GLN773 GLY774<br>TYR32 ALA46 LYS47 PHE48 LEU49 TYR129 HIS133 ALA706 SER709 THR710 ASP711 LYS714 ALA771 SER772 GLN773 GLY774                         |
| 10-epi-Dehydrothyrsiferol    | -7.2                                                        | SER778 LYS780 ASN781<br>TYR32 ALA46 LYS47 TYR129 HIS133 ALA706 LEU707 SER709 THR710 ASP711 LYS714 ALA771 SER772 GLN773 GLY774 LEU775                                                                                         |
| 13-Hydroxyprethyrseanol A    | -7                                                          | VAL776 SER778 LYS780 ASN781<br>LYS47 TYR129 HIS133 ASP135 ASN138 ALA706 SER709 THR710 ALA771 SER772 GLN773 GLY774 VAL776 SER778 ILE779 LYS780                                                                                |
| 15,16-Dehydrovenustatriol    | -7.7                                                        | ASN781<br>TYR32 ALA46 LYS47 PHE48 LEU49 TYR129 HIS133 ALA706 SER709 THR710 ASP711 PHE766 ALA771 SER772 GLY774 VAL776                                                                                                         |
| 15-DehydroxythyrsenolA       | -7.5                                                        | SER778 ILE779 LYS780 ASN781 THR801<br>TYR32 LYS47 PHE48 TYR129 ALA706 SER709 THR710 ASP711 LYS714 PHE766 ALA771 SER772 GLN773 GLY774 SER778 ILE779                                                                           |
| 16-Hydroxydehydrothyrsiferol | -7.7                                                        | LYS780 ASN781 GLU796 THR801<br>ASP135 GLU136 GLY137 LYS143 PHE157 ASN158 LYS159 LYS160 ASP161 TRP162 TYR163 HIS613 MET615 PHE766 SER768                                                                                      |
| Beta cryptoxanthin           | -7.9                                                        | ALA771 SER772 SER778 ILE779 LYS780 LYS783 GLU796 THR801<br>TYR32 LYS47 ASP126 TYR129 ALA130 HIS133 PHE134 ASP135 ASN138 CYS139 ASP140 THR141 LEU142 SER709 ASP711 LYS714                                                     |
| Brassicasterol               | -7.9                                                        | LYS780<br>TYR32 ALA46 LYS47 PHE48 TYR129 ALA130 HIS133 ASP135 ASN138 CYS139 SER709 THR710 ASP711 LYS714 SER772 GLN773                                                                                                        |
| Bromophycoic acid A          | -7.5                                                        | LYS780<br>TYR32 ALA46 LYS47 PHE48 TYR129 ASN138 ASN705 ALA706 SER709 THR710 ASP711 LYS714 ALA771 SER772 GLN773 GLY774                                                                                                        |
| Bromophycoic acid D          | -7.5                                                        | VAL776 SER778 LYS780 ASN781                                                                                                                                                                                                  |
| Bromophycoic acid E          | -7.9                                                        | TYR32 ALA46 LYS47 TYR129 ASN138 SER709 THR710 ASP711 LYS714 ILE715 ALA716 GLN773 LEU775                                                                                                                                      |
| Bromophycolide A             | -7.9                                                        | TYR32 ALA46 LYS47 TYR129 HIS133 ASN138 ALA706 SER709 THR710 ASP711 LYS714 GLN773 GLY774 LYS780                                                                                                                               |
| Bromophycolide B             | -7.4                                                        | TYR32 ALA46 LYS47 TYR129 ALA706 SER709 THR710 ASP711 LYS714 ALA771 SER772 GLN773 GLY774 LEU775 LYS780 ASN781                                                                                                                 |

|                               |      |                                                                                                                                                                                                                               |
|-------------------------------|------|-------------------------------------------------------------------------------------------------------------------------------------------------------------------------------------------------------------------------------|
| Bromophycolide C              | -7.5 | TYR32 LYS47 ASP126 TYR129 ALA130 LEU131 HIS133 PHE134 ASP135 ASN138 CYS139 ASP140 THR141 LEU142 LYS780<br>TYR32 LYS47 PHE48 TYR129 ALA706 SER709 THR710 ASP711 LYS714 ALA771 SER772 GLN773 GLY774 VAL776 SER778 LYS780        |
| Bromophycolide D              | -7.8 | ASN781                                                                                                                                                                                                                        |
| Bromophycolide F              | -7.7 | TYR32 ALA46 LYS47 TYR129 HIS133 ASN138 ALA706 SER709 THR710 ASP711 GLY774 LYS780 ASN781                                                                                                                                       |
| Bromophycolide J              | -7.5 | TYR32 LYS47 TYR129 HIS133 ASN138 SER709 THR710 ASP711 LYS714 ILE715 SER772 GLN773 GLY774 LYS780<br>TYR129 ASN705 ALA706 LEU707 SER709 THR710 ASP711 ALA771 SER772 GLN773 GLY774 LEU775 VAL776 SER778 LYS780                   |
| Bromophycolide M              | -7   | ASN781                                                                                                                                                                                                                        |
| Bromophycolide N              | -7.6 | TYR32 LYS47 TYR129 HIS133 ASN138 ALA706 SER709 THR710 SER772 GLN773 GLY774 SER778 LYS780 ASN781                                                                                                                               |
| Bromophycolide O              | -7.7 | LYS47 TYR129 ALA706 SER709 THR710 ASP711 ALA771 SER772 GLN773 GLY774 SER778 LYS780 ASN781                                                                                                                                     |
| Bromophycolide Q              | -7.5 | TYR32 LYS47 TYR129 HIS133 ASN138 SER709 THR710 ALA771 SER772 GLN773 GLY774 LYS780 ASN781                                                                                                                                      |
| Bromophycolide T              | -7.3 | LYS47 TYR129 HIS133 ASN138 SER709 THR710 ASP711 LYS714 SER772 GLN773 GLY774 LYS780 ASN781                                                                                                                                     |
| Bromophycolide U              | -7.6 | TYR129 HIS133 ALA706 SER709 THR710 ASP711 ALA771 SER772 GLN773 GLY774 VAL776 ALA777 SER778 LYS780 ASN781                                                                                                                      |
| Callophycoic acid C           | -7.6 | TYR32 ALA46 LYS47 TYR129 HIS133 SER709 THR710 ASP711 LYS714 ALA771 SER772 GLN773 GLY774 LYS780 ASN781<br>ALA46 LYS47 TYR129 ASN705 ALA706 SER709 THR710 ASP711 LYS714 ILE715 ALA716 ALA771 SER772 GLN773 GLY774 LEU775        |
| Callophycoic acid D           | -7.8 | VAL776 SER778 LYS780 ASN781<br>TYR32 ALA46 LYS47 PHE48 TYR129 SER709 THR710 ASP711 LYS714 ILE715 ALA771 SER772 GLN773 GLY774 SER778 LYS780                                                                                    |
| Callophycoic acid E           | -7.2 | ASN781                                                                                                                                                                                                                        |
| Campesterol                   | -7.5 | TYR32 LYS47 ASP126 TYR129 ALA130 HIS133 PHE134 ASP135 ASN138 CYS139 THR141 LEU142 SER709 ASP711 LYS714 LYS780<br>TYR32 LYS47 PHE48 TYR129 ASN138 ALA706 SER709 THR710 ASP711 LYS714 ALA771 SER772 GLN773 GLY774 VAL776 ALA777 |
| Cholest-4-en-3,6-dione        | -7.1 | SER778 LYS780 ASN781                                                                                                                                                                                                          |
| Dehydrovenustatriol           | -7.7 | LYS47 TYR129 HIS133 ASN138 ALA706 SER709 PHE766 ALA771 SER772 GLY774 VAL776 SER778 ILE779 LYS780 ASN781 THR801                                                                                                                |
| Lactodehydrothysiferol        | -7.2 | TYR32 LYS47 TYR129 ASN138 ALA706 SER709 THR710 ASP711 LYS714 GLN773 GLY774 VAL776 SER778 LYS780 ASN781                                                                                                                        |
| Neurymenolide A               | -7.1 | TYR32 ALA46 LYS47 TYR129 ASN138 ALA706 SER709 THR710 ASP711 LYS714 GLN773 GLY774 SER778 LYS780 ASN781                                                                                                                         |
| Neurymenolide B               | -7.7 | TYR32 ALA46 LYS47 TYR129 ALA130 HIS133 ASP135 ASN138 THR141 SER709 THR710 ASP711 LYS714 GLN773 GLY774 LYS780<br>TYR32 ALA46 LYS47 PHE48 TYR129 HIS133 ALA706 SER709 THR710 ASP711 LYS714 ALA771 SER772 GLN773 GLY774 VAL776   |
| Neoirietetraol                | -7   | SER778 LYS780 ASN781<br>ALA46 LYS47 TYR129 HIS133 ASN138 MET615 SER709 THR710 ASP711 PHE766 ALA771 SER772 GLN773 GLY774 SER778 ILE779                                                                                         |
| Predehydrovenustatriolacetate | -7   | LYS780 ASN781 THR801                                                                                                                                                                                                          |

|                            |      |                                                                                                                                                      |
|----------------------------|------|------------------------------------------------------------------------------------------------------------------------------------------------------|
| Prethyrserenol A           | -7.7 | TYR32 ALA46 LYS47 TYR129 ASN705 ALA706 SER709 THR710 ASP711 LYS714 ALA771 SER772 GLN773 GLY774 VAL776 SER778 ILE779 LYS780 ASN781 GLU796             |
| Pseudodehydrothyrseriferol | -7.2 | TYR32 ALA46 LYS47 PHE48 LEU49 TYR129 ALA706 SER709 THR710 ASP711 LYS714 PHE766 SER768 ALA771 SER772 GLN773 GLY774 ALA777 SER778 ILE779 LYS780 ASN781 |
| Stigmasterol               | -7   | TYR32 LYS47 TYR129 ASN138 SER709 THR710 ASP711 LYS714 ILE715 ALA716 SER772 GLN773 GLY774 LEU775                                                      |

**Table S5:** Natural products listed in upper-moderate class for RdRp

| RDRP N-Terminal         |                                                    |                                                                                                                                                 |
|-------------------------|----------------------------------------------------|-------------------------------------------------------------------------------------------------------------------------------------------------|
| Ligands                 | Binding affinity<br>( <sup>-</sup> 8.0 and higher) | Interacting amino acids                                                                                                                         |
| Bromophycoic acid B     | -8.2                                               | TYR32 ALA46 LYS47 PHE48 TYR129 ALA130 HIS133 ASP135 ASN138 SER709 THR710 ASP711 LYS714 SER772 GLN773 GLY774 LEU775 LYS780                       |
| Bromophycoic acid C     | -8.2                                               | TYR32 LYS47 TYR129 ALA130 HIS133 ASN138 CYS139 SER709 THR710 ASP711 LYS714 ILE715 GLN773 GLY774 LYS780                                          |
| Bromophycolide E        | -8.5                                               | TYR32 ALA46 LYS47 TYR129 ALA130 HIS133 PHE134 ASP135 ASN138 CYS139 ASP140 THR141 LEU142 SER709 THR710 LYS780 ASN781                             |
| Bromophycolide H        | -8                                                 | TYR32 ALA46 LYS47 PHE48 LEU49 TYR129 HIS133 ASN138 SER709 THR710 ASP711 LYS714 SER772 GLN773 GLY774 LYS780 ASN781                               |
| Bromophycolide K        | -8.2                                               | TYR32 ALA46 LYS47 TYR129 HIS133 ASN138 SER709 THR710 ASP711 LYS714 ALA771 SER772 GLN773 GLY774 VAL776 SER778 LYS780 ASN781                      |
| Bromophycolide L        | -8.2                                               | LYS780 ASN781                                                                                                                                   |
| Bromophycolide P        | -8.2                                               | TYR32 LYS47 TYR129 HIS133 ASN138 SER709 THR710 ASP711 LYS714 SER772 GLN773 GLY774 SER778 LYS780 ASN781                                          |
| Bromophycolide R        | -8.2                                               | TYR32 LYS47 TYR129 HIS133 ASN138 SER709 THR710 ASP711 LYS714 ALA771 SER772 GLN773 GLY774 LYS780 ASN781                                          |
| Bromophycolide S        | -8.7                                               | TYR32 LYS47 TYR129 HIS133 ASN138 ALA706 SER709 THR710 ASP711 GLY774 LYS780 ASN781                                                               |
| Callicladol             | -8.8                                               | TYR32 LYS47 TYR129 HIS133 ASN138 ALA706 SER709 THR710 ASP711 GLY774 SER778 LYS780 ASN781                                                        |
| Dehydrothyrseriferol    | -8.9                                               | ALA46 LYS47 PHE48 TYR129 HIS133 ALA706 SER709 THR710 ASP711 PHE766 SER768 ALA771 SER772 GLN773 GLY774 VAL776 SER778 ILE779 LYS780 ASN781 THR801 |
| Isodehydrothyrseriferol | -8.2                                               | ALA46 LYS47 PHE48 TYR129 HIS133 SER709 THR710 ASP711 PHE766 ALA771 SER772 GLN773 GLY774 VAL776 SER778 ILE779 LYS780 ASN781 THR801               |

|               |      |                                                                                                                                                                                                                               |
|---------------|------|-------------------------------------------------------------------------------------------------------------------------------------------------------------------------------------------------------------------------------|
| Laurebiphenyl | -8   | TYR32 LYS47 ASP126 TYR129 ALA130 HIS133 PHE134 ASP135 ASN138 CYS139 ASP140 THR141 LEU142 SER709 LYS780<br>TYR32 ALA46 LYS47 TYR129 ASP135 GLY137 ASN138 ALA706 SER709 THR710 ASP711 ALA771 SER772 GLN773 GLY774 SER778        |
| Lithothamin A | -9   | ILE779 LYS780 ASN781 GLU796                                                                                                                                                                                                   |
| Mammeisin     | -8   | TYR32 ALA46 LYS47 TYR129 ALA706 SER709 THR710 ASP711 LYS714 ILE715 SER772 GLN773 GLY774 SER778 LYS780 ASN781<br>TYR32 LYS47 TYR129 ALA706 SER709 THR710 ASP711 LYS714 ALA771 SER772 GLN773 GLY774 VAL776 ALA777 SER778 ILE779 |
| Thyrsenol A   | -8   | LYS780 ASN781 GLU796<br>ALA46 LYS47 TYR129 HIS133 ASN705 ALA706 SER709 THR710 ASP711 LYS714 ALA771 SER772 GLN773 GLY774 SER778 LYS780                                                                                         |
| Thyrsenol B   | -8   | ASN781<br>ALA46 LYS47 PHE48 TYR129 HIS133 ASN138 HIS613 ASN705 ALA706 SER709 THR710 ASP711 PHE766 SER768 ALA771 SER772                                                                                                        |
| Thyrsiferol   | -8.2 | GLN773 GLY774 VAL776 SER778 LYS780 ASN781                                                                                                                                                                                     |

**Table S6:** Natural products with highest binding affinity for RdRp

| C-Terminal catalytic core region RdRp |                                |                                                                                                                                                                                                                             |
|---------------------------------------|--------------------------------|-----------------------------------------------------------------------------------------------------------------------------------------------------------------------------------------------------------------------------|
| Ligands                               | Binding Affinity<br>(Kcal/mol) | Amino acids involved                                                                                                                                                                                                        |
| Bromophycoic acid B                   | -8.2                           | ASP452 LYS551 ARG553 ALA554 ARG555 THR556 ASP618 TYR619 PRO620 LYS621 CYS622 ASP623 ARG624 ASP760 PHE793 MET794<br>SER795 LYS798                                                                                            |
| Bromophycoic acid C                   | -7.7                           | ARG555 ASP618 TYR619 PRO620 LYS621 CYS622 ASN691 SER759 ASP760 ASP761 PHE793 MET794 SER795 LYS798                                                                                                                           |
| Bromophycolide E                      | -7.2                           | ARG553 ARG555 ASP618 TYR619 PRO620 CYS622 ASP623 THR680 SER682 THR687 ALA688 ASN691 LEU758 SER759 ASP760 ASP761 CYS813                                                                                                      |
| Bromophycolide H                      | -6.5                           | ARG553 ARG555 ASP618 LYS621 CYS622 ASP623 LEU758 SER759 ASP760 ASP761 CYS813                                                                                                                                                |
| Bromophycolide K                      | -6.5                           | LYS551 ARG553 ARG555 ASP618 TYR619 PRO620 LYS621 CYS622 ASP623 ASN691 SER759 ASP760 ASP761 LYS798                                                                                                                           |
| Bromophycolide L                      | -7.0                           | ARG553 ARG555 TRP617 ASP618 TYR619 LYS621 CYS622 ASP623 ASN691 LEU758 SER759 ASP760 ASP761 CYS813                                                                                                                           |
| Bromophycolide P                      | -6.5                           | ARG553 ARG555 ASP618 TYR619 PRO620 LYS621 CYS622 ASP623 ASP760 ASP761 SER814                                                                                                                                                |
| Bromophycolide R                      | -7.5                           | ASP164 VAL166 GLU167 LYS551 ARG553 ASP618 TYR619 PRO620 LYS621 CYS622 ASP623 ASP760 PHE793 MET794 SER795 LYS798                                                                                                             |
| Bromophycolide S                      | -7.9                           | ASP164 VAL166 GLU167 LYS551 ARG553 ASP618 TYR619 PRO620 LYS621 CYS622 ASP623 PHE793 MET794 SER795 LYS798<br>ASP161 ASP164 VAL166 GLU167 LYS551 ARG555 ASP618 TYR619 PRO620 LYS621 CYS622 ASP623 THR680 ASN691 SER759 ASP760 |
| Callicladol                           | -8.2                           | PHE793 MET794 SER795 LYS798                                                                                                                                                                                                 |

|                      |      |                                                                                                                                                                                                                          |
|----------------------|------|--------------------------------------------------------------------------------------------------------------------------------------------------------------------------------------------------------------------------|
| Dehydrothysiferol    | -7.8 | ASP164 VAL166 GLU167 LYS551 ARG555 ASP618 TYR619 PRO620 LYS621 CYS622 ASP623 THR680 ASN691 SER759 ASP760 PHE793 SER795 LYS798                                                                                            |
| Isodehydrothysiferol | -7.7 | ASP164 VAL166 GLU167 LYS551 ARG553 ARG555 ASP618 TYR619 PRO620 LYS621 CYS622 ASP623 ASP760 PHE793 MET794 SER795 LYS798                                                                                                   |
| Laurebiphenyl        | -7.2 | ASP164 VAL166 GLU167 LYS551 ARG553 ASP618 TYR619 PRO620 LYS621 CYS622 ASP623 ASP760 PHE793 SER795 LYS798 LYS551 ARG553 ARG555 ASP618 TYR619 PRO620 LYS621 CYS622 ASP623 ARG624 THR680 SER682 THR687 ASN691 LEU758 SER759 |
| Lithothamin A        | -8.0 | ASP760 ASP761 LYS798 GLU811 CYS813 SER814                                                                                                                                                                                |
| Mammeisin            | -6.2 | LYS551 ARG555 TRP617 ASP618 TYR619 PRO620 LYS621 CYS622 ASP623 ASN691 ASP760 ASP761 ALA762 LYS798                                                                                                                        |
| Thyrsenol A          | -6.9 | ARG555 ASP618 TYR619 PRO620 LYS621 CYS622 ASP623 THR687 ALA688 ASN691 LEU758 SER759 ASP760 ASP761 CYS813                                                                                                                 |
| Thyrsenol B          | -7.2 | ASP164 VAL166 GLU167 LYS551 ARG553 ASP618 TYR619 PRO620 LYS621 CYS622 ASP623 LEU758 ASP760 ASP761 PHE793 MET794 SER795 LYS798 GLU811 CYS813 SER814                                                                       |
| Thysiferol           | -7.2 | ASP164 VAL166 GLU167 LYS551 TRP617 ASP618 TYR619 PRO620 LYS621 CYS622 ASP623 ASP760 ASP761 PHE793 SER795 LYS798 GLU811 CYS813 SER814                                                                                     |

**Table S7:** Outcome of docking the C-terminal catalytic region of RdRP

| NSP15 Endoribonuclease      |                                  |                                                                                            |
|-----------------------------|----------------------------------|--------------------------------------------------------------------------------------------|
| Ligands                     | Binding affinity ('-4.0 to -4.9) | Interacting amino acids                                                                    |
| 9-octadecanoic acid         | -4.7                             | HIS235 LEU246 GLY247 GLY248 HIS250 LYS290 TRP333 GLU340 THR341 TYR343                      |
| 14-methylpentadecanoic acid | -4.7                             | HIS235 LEU246 GLY247 GLY248 HIS250 LYS290 TRP333 GLU340 THR341 TYR343                      |
| Bosseopentanoic acid        | -4.9                             | HIS235 GLN245 LEU246 GLY247 GLY248 HIS250 LYS290 VAL292 SER294 THR341 TYR343 PRO344        |
| Halomon                     | -4.2                             | HIS235 LEU246 GLY247 GLY248 HIS250 LYS290 VAL292 SER294 THR341 TYR343 PRO344 LYS345 LEU346 |
| Hordenine                   | -4.7                             | HIS235 GLY247 GLY248 HIS250 LYS290 VAL292 SER294 THR341 TYR343 PRO344 LYS345 LEU346        |
| Octadecanedioic acid        | -4.9                             | HIS235 ASP240 HIS243 GLN245 LEU246 GLY247 GLY248 HIS250 LYS290 TRP333 GLU340 THR341 TYR343 |
| Tiomanene                   | -4.7                             | ASN75 LEU76 LYS181 GLN188 GLN189 LEU190 PRO191 GLU192 THR322 TYR325 GLU327                 |

**Table S8:** Natural products listed under subcategory 1 in low class for nsp15

## NSP15 Endoribonuclease

| Ligands                       | Binding affinity<br>('-5.0 to -5.9) | Interacting amino acids                                                                    |
|-------------------------------|-------------------------------------|--------------------------------------------------------------------------------------------|
| 1-methyl-2,3,5-tribromoindole | -5.2                                | HIS235 GLY248 HIS250 LYS290 VAL292 CYS293 SER294 THR341 TYR343 PRO344 LEU346               |
| 2-bromospironipol             | -5.7                                | HIS250 LYS290 VAL292 CYS293 SER294 TYR343 PRO344 LYS345 LEU346                             |
| 3,4-epoxypalisadin B          | -5.9                                | HIS235 GLY248 HIS250 LYS290 VAL292 SER294 THR341 TYR343 PRO344 LYS345 LEU346               |
| 3alpha-Hydroxydebromoaplysin  | -5.7                                | HIS250 LYS290 VAL292 SER294 MET331 TYR343 PRO344 LYS345 LEU346                             |
| 4-Hydroxy-1,8-epi-isotenerone | -5.7                                | HIS235 LEU246 GLY247 GLY248 HIS250 LYS290 TRP333 THR341 TYR343                             |
| 5-acetoxyoachamigrene         | -5.7                                | HIS235 LEU246 GLY247 GLY248 HIS250 LYS290 TRP333 GLU340 THR341 TYR343                      |
| 5-acetoxypalisadin B          | -5.9                                | HIS235 GLN245 LEU246 GLY247 GLY248 HIS250 LYS290 VAL292 SER294 TRP333 THR341 TYR343 LEU346 |
| 6,8-cycloeudesmane            | -5.2                                | HIS250 LYS290 VAL292 CYS293 SER294 MET331 TYR343 PRO344 LYS345 LEU346                      |
| 7-acetyl-aplysiol             | -5.9                                | HIS235 GLN245 LEU246 GLY248 HIS250 LYS290 VAL292 CYS293 THR341 TYR343                      |
| 9-Deoxyelatol                 | -5.5                                | HIS235 LEU246 GLY247 GLY248 HIS250 LYS290 VAL292 SER294 TRP333 THR341 TYR343               |
| 10-Bromo-beta-chamigrene      | -5.7                                | HIS235 LEU246 GLY247 HIS250 LYS290 VAL292 CYS293 SER294 TRP333 THR341 TYR343 PRO344        |
| Aristolan-8-en-1-one.mol      | -5.7                                | HIS235 LEU246 GLY247 GLY248 HIS250 LYS290 TRP333 THR341 TYR343                             |
| Aristolan-10-ol-9-one         | -5.5                                | HIS235 LEU246 GLY247 GLY248 HIS250 LYS290 VAL292 THR341 TYR343                             |
| Aristolane                    | -5.2                                | HIS235 LEU246 GLY248 HIS250 LYS290 VAL292 TRP333 THR341 TYR343                             |
| Almadioxide                   | -5.5                                | HIS235 GLN245 LEU246 GLY247 GLY248 HIS250 LYS290 THR341 TYR343                             |
| Aromadendrene                 | -5.5                                | GLN245 HIS250 LYS290 VAL292 SER294 TYR343 PRO344 LYS345 LEU346                             |
| Aplysiol-7-one                | -5.2                                | HIS235 GLN245 LEU246 GLY247 GLY248 HIS250 LYS290 THR341 TYR343                             |
| Aplysiolic acid               | -5.9                                | HIS235 GLN245 LEU246 GLY248 HIS250 LYS290 VAL292 CYS293 SER294 THR341 TYR343               |
| Beta Synderol                 | -5.5                                | HIS235 LEU246 GLY247 GLY248 HIS250 LYS290 VAL292 SER294 THR341 TYR343 PRO344               |
| Brasilanol                    | -5.5                                | HIS235 GLN245 GLY248 HIS250 LYS290 VAL292 CYS293 SER294 THR341 TYR343 PRO344               |
| (-)-BisezakyneA               | -5.7                                | HIS235 GLY248 HIS250 LYS290 VAL315 TRP333 CYS334 LYS335 GLU340 THR341 TYR343               |
| Callenzanol                   | -5.9                                | HIS235 HIS250 LYS290 VAL292 CYS293 SER294 TRP333 THR341 TYR343 PRO344 LYS345 LEU346        |
| Chamigrene epoxide            | -5.5                                | HIS235 LEU246 GLY247 GLY248 HIS250 LYS290 VAL292 SER294 THR341 TYR343                      |
| Chinzallene                   | -5.7                                | HIS235 LEU246 GLY247 GLY248 HIS250 LYS290 VAL292 SER294 TRP333 THR341 TYR343 PRO344 LEU346 |
| Compositacin A                | -5.5                                | HIS250 LYS290 VAL292 SER294 TYR343 PRO344 LYS345 LEU346                                    |



|                     |      |                                                                                                   |
|---------------------|------|---------------------------------------------------------------------------------------------------|
| Compositacin D      | -5.2 | HIS235 GLN245 LEU246 GLY247 GLY248 HIS250 LYS290 VAL292 SER294 THR341 TYR343 PRO344               |
| Compositacin E      | -5.9 | GLN245 LEU246 GLY247 GLY248 HIS250 LYS290 VAL292 CYS293 SER294 TYR343 PRO344 LYS345 LEU346        |
| Compositacin F      | -5.5 | GLN245 HIS250 LYS290 VAL292 CYS293 SER294 TYR343 PRO344 LYS345 LEU346                             |
| Compositacin G      | -5.7 | HIS235 GLN245 LEU246 GLY247 GLY248 HIS250 LYS290 VAL292 SER294 TRP333 THR341 TYR343 PRO344        |
| Compositacin H      | -5.7 | HIS250 LYS290 VAL292 CYS293 SER294 TYR343 PRO344 LYS345 LEU346                                    |
| Compositacin L      | -5.5 | HIS235 LEU246 GLY247 GLY248 HIS250 LYS290 TRP333 GLU340 THR341 TYR343                             |
| Compositacin M      | -5.7 | HIS235 GLN245 LEU246 GLY248 HIS250 LYS290 VAL292 CYS293 SER294 TYR343 PRO344 LYS345 LEU346        |
| Compositacin N      | -5.7 | HIS235 LEU246 GLY247 GLY248 HIS250 LYS290 VAL292 SER294 TRP333 THR341 TYR343 PRO344               |
| Cycloelatanene A    | -5.7 | HIS235 GLN245 LEU246 GLY247 GLY248 HIS250 LYS290 VAL292 TRP333 THR341 TYR343                      |
| Cycloelatanene B    | -5.5 | HIS235 GLN245 LEU246 GLY247 GLY248 HIS250 LYS290 VAL292 THR341 TYR343                             |
| Cycloeudesmol       | -5.2 | HIS235 GLN245 LEU246 GLY247 GLY248 HIS250 LYS290 VAL292 THR341 TYR343                             |
| Cyclolaurenol       | -5.7 | HIS250 LYS290 VAL292 SER294 THR341 TYR343 PRO344 LYS345 LEU346                                    |
| Dactyllyne          | -5.7 | HIS235 LEU246 GLY247 GLY248 HIS250 LYS290 VAL292 CYS293 SER294 TRP333 THR341 TYR343 PRO344 LEU346 |
| Debromoepiaplysinol | -5.9 | HIS235 GLY247 GLY248 HIS250 LYS290 TRP333 THR341 TYR343                                           |
| Dendroidiol         | -5.7 | HIS235 LEU246 GLY247 GLY248 HIS250 LYS290 TRP333 GLU340 THR341 TYR343                             |
| Dendroidone         | -5.9 | HIS235 GLN245 LEU246 GLY247 GLY248 HIS250 LYS290 VAL292 SER294 TRP333 THR341 TYR343 PRO344        |
| Deoxyprepacifenol   | -5.7 | HIS235 GLY247 GLY248 HIS250 LYS290 VAL292 TRP333 THR341 TYR343                                    |
| Deschloroelatol     | -5.9 | HIS235 GLY248 HIS250 LYS290 CYS291 VAL292 SER294 THR341 TYR343 LEU346                             |
| Elatol              | -5.7 | HIS235 GLN245 LEU246 GLY247 GLY248 HIS250 LYS290 VAL292 SER294 TRP333 THR341 TYR343 PRO344        |
| Epibrasilenol       | -5.7 | HIS235 GLN245 LEU246 GLY247 GLY248 HIS250 LYS290 VAL292 CYS293 SER294 THR341 TYR343 PRO344        |
| Elatenyne           | -5.7 | HIS235 GLN245 LEU246 GLY247 GLY248 HIS250 LYS290 VAL292 TRP333 THR341 TYR343                      |
| Floridoside         | -5   | HIS235 GLN245 LEU246 GLY247 GLY248 HIS250 LYS290 VAL292 CYS293 SER294 THR341 PHE342 TYR343        |
| Guimarediol         | -5.9 | GLY248 HIS250 LYS290 VAL292 CYS293 SER294 TYR343 PRO344 LEU346                                    |
| Heterocladol        | -5.7 | HIS235 GLN245 LEU246 GLY248 HIS250 LYS290 VAL292 SER294 THR341 TYR343 PRO344 LYS345 LEU346        |
| Isolaurenidificin   | -5.7 | HIS235 LEU246 GLY247 GLY248 HIS250 LYS290 VAL292 TRP333 GLU340 THR341 TYR343                      |
| Isoafricanol        | -5.5 | HIS250 LYS290 VAL292 CYS293 SER294 TYR343 PRO344 LYS345 LEU346                                    |
| Isoaplysin          | -5.7 | HIS235 LEU246 GLY247 GLY248 HIS250 LYS290 VAL292 SER294 TRP333 THR341 TYR343                      |
| Isodactyloxene A    | -5.5 | HIS250 LYS290 VAL292 CYS293 SER294 TYR343 PRO344 LYS345 LEU346                                    |

|                     |      |                                                                                                                                                                            |
|---------------------|------|----------------------------------------------------------------------------------------------------------------------------------------------------------------------------|
| Isoobtusol          | -5.5 | GLN245 LEU246 HIS250 LYS290 VAL292 SER294 TYR343 PRO344 LYS345 LEU346                                                                                                      |
| Isopalisol          | -5.7 | HIS235 LEU246 GLY247 GLY248 HIS250 LYS290 VAL292 SER294 THR341 TYR343 PRO344 LYS345 LEU346                                                                                 |
| Isorigidol          | -5.5 | GLN245 HIS250 ASN278 LYS290 VAL292 SER294 TYR343 PRO344 LYS345 LEU346                                                                                                      |
| Intricenyne         | -5.7 | HIS235 LEU246 GLY247 GLY248 HIS250 LYS290 VAL292 TRP333 GLU340 THR341 TYR343                                                                                               |
| Isolaurallene       | -5.5 | HIS235 GLY248 HIS250 LYS290 VAL292 TRP333 GLU340 THR341 TYR343                                                                                                             |
| Itomanindole A      | -5.5 | HIS235 LEU246 GLY247 GLY248 HIS250 LYS290 VAL292 SER294 TRP333 THR341 TYR343 PRO344 LEU346                                                                                 |
| Kumausallene        | -5.2 | HIS235 GLY248 HIS250 LYS290 VAL292 SER294 TRP333 GLU340 THR341 TYR343 PRO344 LYS345 LEU346                                                                                 |
| Laurecomin B        | -5.7 | HIS250 ASN278 LYS290 VAL292 CYS293 SER294 TYR343 PRO344 LYS345 LEU346                                                                                                      |
| Laurecomin C        | -5.5 | HIS235 GLY248 HIS250 LYS290 VAL292 TRP333 THR341 TYR343                                                                                                                    |
| Laurenokomarin      | -5.7 | HIS235 GLY248 HIS250 LYS290 VAL292 TRP333 THR341 TYR343                                                                                                                    |
| Luzondiol           | -5.7 | HIS235 LEU246 GLY247 GLY248 HIS250 LYS290 VAL292 TRP333 GLU340 THR341 TYR343                                                                                               |
| Luzonensin          | -5.2 | HIS250 LYS290 VAL292 CYS293 SER294 TYR343 PRO344 LYS345 LEU346<br>HIS235 LEU246 GLY247 GLY248 HIS250 ASN278 LYS290 VAL292 CYS293 SER294 TRP333 THR341 TYR343 PRO344 LYS345 |
| Luzonensol          | -5.7 | LEU346                                                                                                                                                                     |
| Luzonensolacetate   | -5.5 | HIS235 GLN245 LEU246 GLY247 GLY248 HIS250 LYS290 VAL292 CYS293 SER294 TYR343 PRO344 LYS345 LEU346                                                                          |
| Laurallene          | -5.5 | HIS235 GLY248 HIS250 LYS290 VAL292 CYS293 SER294 MET331 THR341 TYR343 PRO344 LYS345 LEU346                                                                                 |
| Laureacetal B       | -5.9 | HIS235 LEU246 GLY247 GLY248 HIS250 LYS290 VAL292 CYS293 SER294 TRP333 THR341 TYR343 PRO344                                                                                 |
| Laureacetal C       | -5.9 | HIS235 GLN245 LEU246 GLY247 GLY248 HIS250 LYS290 VAL292 SER294 TRP333 THR341 TYR343                                                                                        |
| Laurefurenyne A     | -5   | HIS235 GLN245 LEU246 GLY247 GLY248 HIS250 LYS290 VAL292 TRP333 GLU340 THR341 TYR343                                                                                        |
| Laurefurenyne B     | -5.5 | HIS235 LEU246 GLY247 GLY248 HIS250 LYS290 VAL292 TRP333 GLU340 THR341 TYR343                                                                                               |
| Laurefurenyne D     | -5.7 | HIS235 LEU246 GLY247 GLY248 HIS250 LYS290 TRP333 GLU340 THR341 TYR343                                                                                                      |
| Laurefurenyne E     | -5.7 | HIS235 LEU246 GLY247 GLY248 HIS250 LYS290 VAL292 CYS293 SER294 TRP333 THR341 TYR343 PRO344 LYS345 LEU346                                                                   |
| Laurefurenyne F     | -5.7 | HIS235 LEU246 GLY247 GLY248 HIS250 LYS290 VAL292 SER294 TRP333 THR341 TYR343 PRO344 LEU346                                                                                 |
| Laurencenyne        | -5.2 | HIS235 GLY248 HIS250 LYS290 VAL292 TRP333 GLU340 THR341 TYR343                                                                                                             |
| Laurencial          | -5.7 | HIS235 LEU246 GLY248 HIS250 LYS290 VAL292 CYS293 SER294 THR341 TYR343 LEU346                                                                                               |
| Laurendecumallene A | -5.7 | HIS235 LEU246 GLY247 GLY248 HIS250 LYS290 VAL292 CYS293 SER294 THR341 PHE342 TYR343 PRO344 LYS345 LEU346                                                                   |
| Laurendecumallene B | -5.7 | HIS235 LEU246 GLY247 GLY248 HIS250 LYS290 VAL292 CYS293 SER294 TRP333 GLU340 THR341 PHE342 TYR343 PRO344                                                                   |
| Laurendecumenyne B  | -5.7 | HIS235 GLN245 LEU246 GLY247 GLY248 HIS250 LYS290 VAL292 TRP333 GLU340 THR341 TYR343                                                                                        |

|                         |      |                                                                                                   |
|-------------------------|------|---------------------------------------------------------------------------------------------------|
| Laurenenyne             | -5.9 | HIS235 LEU246 GLY247 GLY248 HIS250 LYS290 VAL315 TRP333 CYS334 LYS335 GLU340 THR341 TYR343        |
| Laurenisol              | -5.7 | HIS235 GLY248 HIS250 LYS290 VAL292 TRP333 GLU340 THR341 PHE342 TYR343                             |
| Laureoxanyne            | -5.9 | HIS235 LEU246 GLY247 GLY248 HIS250 LYS290 VAL292 CYS293 SER294 TRP333 THR341 TYR343 PRO344        |
| Laurepinnacin           | -5.5 | HIS235 LEU246 GLY248 HIS250 LYS290 VAL292 CYS293 SER294 TRP333 THR341 TYR343 PRO344               |
| Mailiohydrin            | -5.5 | HIS235 LEU246 GLY247 GLY248 HIS250 LYS290 VAL292 TRP333 GLU340 THR341 TYR343                      |
| Mailione                | -5.2 | HIS235 GLN245 LEU246 GLY247 GLY248 HIS250 LYS290 TRP333 THR341 TYR343                             |
| Microcladallene A       | -5.2 | HIS235 GLN245 LEU246 GLY247 HIS250 LYS290 VAL292 SER294 TYR343 PRO344 LYS345 LEU346               |
| Microcladallene B       | -5.2 | GLN245 LEU246 GLY247 HIS250 LYS290 VAL292 SER294 TYR343 PRO344 LYS345 LEU346                      |
| Microcladallene C       | -5.5 | HIS235 GLN245 LEU246 GLY247 GLY248 HIS250 LYS290 VAL292 TRP333 GLU340 THR341 TYR343               |
| Neoisoprelaurefucin     | -5.7 | HIS235 GLN245 LEU246 GLY247 GLY248 HIS250 LYS290 VAL292 CYS293 SER294 THR341 TYR343 PRO344        |
| Neolaurallene           | -5.5 | HIS235 LEU246 GLY247 GLY248 HIS250 LYS290 VAL292 SER294 TRP333 THR341 TYR343 PRO344 LYS345 LEU346 |
| Nidificene              | -5.5 | GLN245 LEU246 HIS250 LYS290 VAL292 SER294 TYR343 PRO344 LYS345 LEU346                             |
| Obtusane                | -5.7 | GLN245 LEU246 GLY248 HIS250 LYS290 VAL292 CYS293 SER294 TYR343 PRO344 LYS345 LEU346               |
| Okamurene C             | -5.9 | HIS235 GLY248 HIS250 LYS290 VAL292 SER294 THR341 TYR343 PRO344 LYS345 LEU346                      |
| Okamurene E             | -5.7 | HIS250 LYS290 VAL292 CYS293 SER294 TYR343 PRO344 LYS345 LEU346                                    |
| Omaezallene             | -5.5 | HIS235 GLY248 HIS250 ASN278 LYS290 VAL292 CYS293 SER294 THR341 TYR343 PRO344 LYS345 LEU346        |
| Pacifenol               | -5.5 | HIS235 LEU246 GLY247 GLY248 HIS250 LYS290 VAL292 TRP333 THR341 TYR343                             |
| Palisadin B             | -5.7 | HIS235 GLY248 HIS250 LYS290 VAL292 SER294 TYR343 PRO344 LYS345 LEU346                             |
| Palisadin C             | -5.7 | GLN245 HIS250 LYS290 CYS291 VAL292 CYS293 SER294 TYR343 PRO344 LYS345 LEU346                      |
| Palisadin D             | -5.5 | HIS235 GLY248 HIS250 LYS290 VAL292 SER294 THR341 TYR343 PRO344 LYS345 LEU346                      |
| Pannosane               | -5.5 | GLN245 LEU246 HIS250 LYS290 VAL292 SER294 TYR343 PRO344 LYS345 LEU346                             |
| Perforatone             | -5.7 | HIS250 LYS290 VAL292 CYS293 SER294 MET331 TYR343 PRO344 LYS345 LEU346                             |
| Perforenol              | -5.7 | HIS235 GLN245 LEU246 GLY247 GLY248 HIS250 LYS290 VAL292 TRP333 THR341 TYR343                      |
| Prelaureatin            | -5.2 | GLN245 LEU246 GLY248 HIS250 LYS290 VAL292 CYS293 SER294 THR341 TYR343 PRO344 LYS345 LEU346        |
| Rhodophytin             | -5.2 | HIS235 GLN245 LEU246 GLY247 GLY248 HIS250 LYS290 VAL292 CYS293 SER294 THR341 TYR343 PRO344 LEU346 |
| Scopariol               | -5.2 | HIS235 LEU246 GLY247 GLY248 HIS250 LYS290 VAL292 THR341 TYR343                                    |
| Trans-Deacetylkumausyne | -5.7 | HIS235 GLY247 GLY248 LEU249 HIS250 LYS290 VAL292 SER294 TRP333 THR341 TYR343 PRO344 LYS345 LEU346 |
| Trans-Kumausyne         | -5.2 | HIS235 LEU246 GLY247 GLY248 HIS250 LYS290 TRP333 GLU340 THR341 TYR343                             |

|                    |      |                                                                              |
|--------------------|------|------------------------------------------------------------------------------|
| Trans-Laurencenyne | -5.2 | HIS235 GLY248 HIS250 LYS290 VAL292 VAL315 TRP333 CYS334 GLU340 THR341 TYR343 |
|--------------------|------|------------------------------------------------------------------------------|

**Table S9:** Natural products listed under subcategory 2 in low class for nsp15

| NSP15 Endoribonuclease                                  |                                                 |                                                                                                                                                                            |
|---------------------------------------------------------|-------------------------------------------------|----------------------------------------------------------------------------------------------------------------------------------------------------------------------------|
| Ligands                                                 | Binding affinity<br>( <sup>-</sup> 6.0 to -6.9) | Interacting amino acids                                                                                                                                                    |
| (-)-3-(E)-bromomethylidene-10beta-bromo-beta-chamigrene | -6                                              | HIS250 LYS290 VAL292 SER294 TYR343 PRO344 LYS345 LEU346                                                                                                                    |
| (+)-3-(Z)-bromomethylidene-10beta-bromo-beta-chamigrene | -6                                              | HIS235 LEU246 GLY248 HIS250 LYS290 VAL292 SER294 THR341 TYR343 PRO344 LYS345 LEU346<br>HIS235 LEU246 GLY247 GLY248 HIS250 LYS290 VAL292 CYS293 SER294 TRP333 THR341 TYR343 |
| (5S)-5-Acetoxy-beta-bisabolene                          | -6                                              | PRO344 LYS345 LEU346                                                                                                                                                       |
| (6R,9R,10S)-10-bromo-9-hydroxychamigra-2,7(14)-diene    | -6.5                                            | HIS250 ASN278 LYS290 VAL292 CYS293 SER294 TYR343 PRO344 LYS345 LEU346                                                                                                      |
| (10R)-10-Bromo-alpha-chamigrene                         | -6.2                                            | LEU246 HIS250 LYS290 VAL292 CYS293 SER294 TYR343 PRO344 LYS345 LEU346                                                                                                      |
| 1,2-Dehydro-3,4-epoxypalisadin B                        | -6                                              | HIS235 GLN245 LEU246 GLY247 GLY248 HIS250 LYS290 VAL292 CYS293 SER294 TYR343 PRO344                                                                                        |
| 2-Hydroxyluzofuranone B                                 | -6.5                                            | HIS235 GLY248 HIS250 LYS290 VAL292 CYS293 SER294 THR341 TYR343 PRO344 LYS345 LEU346                                                                                        |
| 3,7-dihydroxydihydrolaurene                             | -6.7                                            | GLY248 HIS250 LYS290 VAL292 CYS293 SER294 TYR343 PRO344 LYS345 LEU346<br>HIS235 LEU246 GLY247 GLY248 HIS250 LYS290 VAL292 CYS293 SER294 TRP333 GLU340 THR341               |
| 3 beta-Hydroperoxyaplysin                               | -6.2                                            | TYR343<br>HIS235 GLN245 LEU246 GLY247 GLY248 HIS250 LYS290 VAL292 CYS293 SER294 THR341 TYR343                                                                              |
| 3-Bromo-4, 5-dihydroxybenzaldehyde                      | -6.5                                            | PRO344 LYS345 LEU346                                                                                                                                                       |
| 3-Epi-PerforenoneA                                      | -6                                              | HIS235 GLN245 LEU246 GLY247 GLY248 HIS250 LYS290 VAL292 THR341 TYR343<br>HIS235 GLN245 LEU246 GLY247 GLY248 HIS250 ASN278 LYS290 VAL292 CYS293 SER294 THR341               |
| 3R,4S-luzonolone                                        | -6                                              | TYR343 PRO344 LYS345 LEU346<br>HIS235 LEU246 GLY247 GLY248 HIS250 LYS290 VAL292 CYS293 SER294 TRP333 THR341 TYR343                                                         |
| 3S, 4R-luzonolone                                       | -6.5                                            | PRO344 LYS345 LEU346                                                                                                                                                       |
| (3Z)-laurenyne                                          | -6                                              | HIS235 GLY248 HIS250 LYS290 VAL292 SER294 THR341 TYR343 PRO344 LYS345 LEU346<br>HIS235 LEU246 GLY248 HIS250 LYS290 VAL292 SER294 TRP333 THR341 TYR343 PRO344 LYS345        |
| 3-Bromobarekoxide                                       | -6.5                                            | LEU346                                                                                                                                                                     |

|                               |      |                                                                                                                                                                            |
|-------------------------------|------|----------------------------------------------------------------------------------------------------------------------------------------------------------------------------|
| 4-hydroxypalisidin C          | -6   | HIS250 LYS290 VAL292 CYS293 SER294 TRP333 THR341 TYR343 PRO344 LYS345 LEU346                                                                                               |
| 5-epi-maneolactone            | -6   | HIS235 LEU246 GLY247 GLY248 HIS250 LYS290 VAL292 TRP333 THR341 TYR343                                                                                                      |
| 7-hydroxylaurene              | -6.7 | HIS235 GLY248 HIS250 LYS290 VAL292 CYS293 SER294 THR341 TYR343 PRO344 LYS345 LEU346<br>HIS235 LEU246 GLY247 GLY248 HIS250 LYS290 VAL292 CYS293 SER294 TRP333 THR341 TYR343 |
| 8,10-dibromoisoplysin         | -6   | PRO344                                                                                                                                                                     |
| 9-hydroxy-3-epi-perforenone A | -6.2 | GLY248 HIS250 LYS290 VAL292 CYS293 SER294 THR341 TYR343 PRO344 LYS345 LEU346<br>HIS235 GLN245 LEU246 GLY247 GLY248 HIS250 LYS290 CYS291 VAL292 CYS293 SER294 THR341        |
| 10-acetoxyangasiol            | -6.7 | TYR343 PRO344<br>HIS235 LEU246 GLY247 GLY248 HIS250 LYS290 VAL292 CYS293 SER294 TRP333 THR341 TYR343                                                                       |
| 10-Bromosoaplyin              | -6   | PRO344                                                                                                                                                                     |
| 10-Hydroxyaplysin             | -6   | HIS235 LEU246 GLY248 HIS250 LYS290 VAL292 CYS293 SER294 TRP333 THR341 TYR343                                                                                               |
| 10-hydroxyisolaurene          | -6.7 | HIS235 GLY248 HIS250 LYS290 VAL292 SER294 THR341 TYR343 PRO344 LYS345 LEU346<br>HIS235 LEU246 GLY247 GLY248 HIS250 LYS290 VAL292 SER294 THR341 TYR343 PRO344 LYS345        |
| 12-hydroxy Isolaurene         | -6.5 | LEU346<br>HIS235 LEU246 GLY247 GLY248 HIS250 LYS290 VAL292 SER294 THR341 TYR343 PRO344 LYS345                                                                              |
| 12-Hydroxypalisadin B         | -6.2 | LEU346                                                                                                                                                                     |
| 15-hydroxypalisadin A         | -6.7 | HIS235 GLY247 GLY248 HIS250 LYS290 VAL292 SER294 THR341 PHE342 TYR343<br>HIS235 LEU246 GLY247 GLY248 HIS250 LYS290 VAL292 SER294 THR341 TYR343 PRO344 LYS345               |
| 15-Hydroxylaurene             | -6.2 | LEU346<br>HIS235 LEU246 GLY247 GLY248 HIS250 LYS290 VAL292 SER294 THR341 TYR343 PRO344 LYS345                                                                              |
| 15-Oxolaurene                 | -6.5 | LEU346<br>HIS235 LEU246 GLY247 GLY248 HIS250 LYS290 VAL292 SER294 GLU340 THR341 TYR343 PRO344                                                                              |
| Acetylmajapolene A            | -6.7 | LYS345 LEU346<br>HIS235 GLY248 HIS250 LYS290 VAL292 CYS293 SER294 TRP333 GLU340 THR341 TYR343 PRO344                                                                       |
| Acetylmajapolene B            | -6.7 | LYS345 LEU346                                                                                                                                                              |
| Aldingenin A                  | -6.2 | GLY248 HIS250 LYS290 VAL292 SER294 THR341 TYR343 PRO344 LYS345 LEU346                                                                                                      |
| Aldingenin B                  | -6.5 | HIS250 ASN278 LYS290 VAL292 SER294 TYR343 PRO344 LYS345 LEU346                                                                                                             |
| Aldingenin C                  | -6.5 | HIS250 LYS290 VAL292 CYS293 SER294 TYR343 PRO344 LYS345 LEU346                                                                                                             |

|                         |      |                                                                                                                 |
|-------------------------|------|-----------------------------------------------------------------------------------------------------------------|
| Aldingenin D            | -6.5 | HIS235 GLN245 LEU246 GLY247 GLY248 HIS250 LYS290 VAL292 SER294 TYR343 PRO344 LYS345 LEU346                      |
| Allolaurinterol         | -6.9 | HIS235 GLY248 HIS250 LYS290 VAL292 CYS293 SER294 THR341 TYR343 PRO344 LYS345 LEU346                             |
| Allolaurinterolacetate  | -6.2 | HIS250 ASN278 LYS290 VAL292 CYS293 SER294 THR341 TYR343 PRO344 LYS345 LEU346                                    |
| Aplysinol               | -6   | GLN245 HIS250 ASN278 LYS290 CYS291 VAL292 CYS293 SER294 TYR343 PRO344 LYS345 LEU346                             |
| AxinynoneB              | -6   | HIS235 LEU246 GLY247 GLY248 HIS250 LYS290 VAL292 THR341 TYR343                                                  |
| Aplysiodiol             | -6.9 | HIS235 LEU246 GLY247 GLY248 HIS250 ASN278 LYS290 VAL292 CYS293 SER294 TRP333 THR341 TYR343 PRO344 LYS345 LEU346 |
| Bromocyclococanol       | -6   | HIS235 LEU246 GLY247 GLY248 HIS250 LYS290 VAL292 SER294 THR341 TYR343 PRO344 LYS345 LEU346                      |
| Bromlaurenidificin      | -6   | HIS235 LEU246 GLY247 GLY248 HIS250 LYS290 VAL292 SER294 TRP333 THR341 TYR343 PRO344                             |
| Bromocuparene           | -6.2 | HIS235 GLY248 HIS250 LYS290 VAL292 SER294 THR341 TYR343 PRO344 LYS345 LEU346                                    |
| Callophycoic acid G     | -6.9 | HIS235 LEU246 GLY247 GLY248 HIS250 LYS290 VAL292 TRP333 GLU340 THR341 TYR343                                    |
| Callophycoic acid J     | -6.2 | HIS235 GLN245 LEU246 GLY247 GLY248 HIS250 LYS290 TRP333 GLU340 THR341 TYR343                                    |
| Callophycol A           | -6.2 | HIS235 GLN245 LEU246 GLY247 GLY248 HIS250 LYS290 VAL292 CYS293 SER294 TRP333 THR341 TYR343 PRO344 LEU346        |
| Callophycol B           | -6.5 | HIS235 GLN245 LEU246 GLY247 GLY248 HIS250 LYS290 VAL292 CYS293 SER294 TRP333 THR341 TYR343 PRO344 LEU346        |
| Chamigrene Lactone      | -6.5 | HIS235 GLN245 LEU246 GLY247 GLY248 HIS250 LYS290 VAL292 SER294 THR341 TYR343 PRO344                             |
| Compositacin B          | -6.2 | HIS235 GLN245 LEU246 GLY247 GLY248 HIS250 LYS290 VAL292 THR341 TYR343                                           |
| Compositacin C          | -6   | LEU246 HIS250 LYS290 VAL292 CYS293 SER294 THR341 TYR343 PRO344 LEU346                                           |
| Compositacin I          | -6   | HIS235 GLY247 GLY248 HIS250 LYS290 TRP333 GLU340 THR341 TYR343                                                  |
| Compositacin J          | -6   | HIS235 LEU246 GLY247 GLY248 HIS250 LYS290 TRP333 GLU340 THR341 TYR343                                           |
| Compositacin K          | -6   | HIS235 GLN245 LEU246 GLY247 GLY248 HIS250 LYS290 VAL292 THR341 TYR343                                           |
| Cycloisoallolaurinterol | -6.2 | HIS235 LEU246 GLY247 GLY248 HIS250 LYS290 VAL292 SER294 THR341 TYR343 PRO344                                    |
| Chlorofucin             | -6   | HIS235 GLN245 LEU246 GLY247 GLY248 HIS250 LYS290 VAL292 CYS293 SER294 THR341 TYR343 PRO344 LYS345 LEU346        |

|                           |      |                                                                                                                                                                     |
|---------------------------|------|---------------------------------------------------------------------------------------------------------------------------------------------------------------------|
| Cupalaurenol              | -6.2 | HIS235 LEU246 GLY247 GLY248 HIS250 LYS290 VAL292 CYS293 SER294 THR341 TYR343 PRO344 LEU346                                                                          |
| Caespitane                | -6.2 | HIS235 LEU246 GLY247 GLY248 HIS250 LYS290 VAL292 SER294 TRP333 THR341 TYR343 PRO344 LYS345 LEU346                                                                   |
| Caespitol                 | -6   | HIS235 LEU246 GLY247 GLY248 HIS250 LYS290 VAL292 TRP333 GLU340 THR341 TYR343                                                                                        |
| Caesspitenone             | -6.2 | HIS235 GLY248 HIS250 LYS290 VAL292 TRP333 GLU340 THR341 TYR343                                                                                                      |
| Debromoisocalenzanol      | -6.2 | HIS235 GLY248 HIS250 LYS290 VAL292 SER294 THR341 TYR343 PRO344 LYS345 LEU346                                                                                        |
| Debromolaurinterol        | -6.5 | HIS235 GLY248 HIS250 LYS290 VAL292 CYS293 SER294 TYR343 PRO344 LYS345 LEU346                                                                                        |
| Debromolaurinterolacetate | -6   | HIS235 GLY248 HIS250 LYS290 VAL292 CYS293 SER294 THR341 TYR343 PRO344 LYS345 LEU346                                                                                 |
| Debromoaplysin            | -6   | HIS250 LYS290 VAL292 SER294 MET331 TYR343 PRO344 LYS345 LEU346                                                                                                      |
| Epiaplysinol              | -6.5 | HIS235 GLY247 GLY248 HIS250 LYS290 VAL292 CYS293 SER294 THR341 TYR343 PRO344 LEU346                                                                                 |
| Filiformin                | -6   | HIS235 LEU246 GLY247 GLY248 HIS250 LYS290 VAL292 TRP333 THR341 TYR343                                                                                               |
| Filiforminol              | -6.7 | HIS235 GLY248 HIS250 ASN278 LYS290 VAL292 CYS293 SER294 THR341 TYR343 PRO344 LEU346                                                                                 |
| Isoallolaurinterol        | -6.7 | HIS235 GLY248 HIS250 LYS290 VAL292 CYS293 SER294 THR341 TYR343 PRO344 LYS345 LEU346                                                                                 |
| Isodebromolaurinterol     | -6   | HIS235 LEU246 GLY247 GLY248 HIS250 LYS290 VAL292 CYS293 SER294 THR341 TYR343 PRO344 LEU346                                                                          |
| Isolaurenisol             | -6.9 | GLY248 HIS250 LYS290 VAL292 CYS293 SER294 THR341 TYR343 PRO344 LYS345 LEU346<br>GLN245 LEU246 HIS250 ASN278 LYS290 VAL292 CYS293 SER294 THR341 TYR343 PRO344 LYS345 |
| Isocaespitol              | -6   | LEU346                                                                                                                                                              |
| Isodihydro laurene        | -6.2 | HIS235 GLY248 HIS250 LYS290 VAL292 SER294 THR341 TYR343 PRO344 LYS345 LEU346<br>HIS235 GLN245 LEU246 GLY247 GLY248 HIS250 LYS290 VAL292 CYS293 SER294 TRP333 GLU340 |
| Isolaureatin              | -6   | THR341 TYR343 PRO344                                                                                                                                                |
| Isolaurene                | -6.5 | HIS235 GLY248 HIS250 LYS290 VAL292 SER294 THR341 TYR343 PRO344 LYS345 LEU346                                                                                        |
| Japonenyne A              | -6   | HIS235 GLY248 HIS250 LYS290 VAL292 SER294 THR341 TYR343 PRO344 LYS345 LEU346                                                                                        |
| Johnstonol                | -6   | GLN245 HIS250 LYS290 VAL292 CYS293 SER294 TYR343 PRO344 LYS345 LEU346<br>HIS235 LEU246 GLY247 GLY248 HIS250 LYS290 VAL292 CYS293 SER294 THR341 TYR343 PRO344        |
| Laurecomin A              | -6.3 | LYS345 LEU346                                                                                                                                                       |
| Laurecomin D              | -6.2 | HIS235 GLN245 LEU246 GLY247 GLY248 HIS250 LYS290 VAL292 TRP333 THR341 TYR343                                                                                        |

|                     |      |                                                                                                                                                                            |
|---------------------|------|----------------------------------------------------------------------------------------------------------------------------------------------------------------------------|
| Laurencomposidiene  | -6   | HIS250 LYS290 VAL292 CYS293 SER294 TYR343 PRO344 LYS345 LEU346<br>HIS235 LEU246 GLY247 GLY248 HIS250 LYS290 VAL292 CYS293 SER294 THR341 TYR343 PRO344                      |
| Laurene             | -6.5 | LYS345 LEU346                                                                                                                                                              |
| Laurentristich-4-ol | -6.5 | HIS235 GLY248 HIS250 LYS290 VAL292 SER294 THR341 TYR343 PRO344 LYS345 LEU346                                                                                               |
| Laureperoxide       | -6.2 | HIS235 GLN245 LEU246 GLY247 GLY248 HIS250 LYS290 VAL292 SER294 THR341 TYR343                                                                                               |
| Laurepoxyene        | -6   | HIS235 GLY248 HIS250 LYS290 VAL292 CYS293 SER294 THR341 TYR343 PRO344 LYS345 LEU346<br>HIS235 GLN245 LEU246 GLY247 GLY248 HIS250 LYS290 VAL292 CYS293 SER294 THR341 TYR343 |
| Laurinterolacetate  | -6.2 | PRO344                                                                                                                                                                     |
| Laurokamurene A     | -6.5 | HIS235 GLY248 HIS250 LYS290 VAL292 CYS293 SER294 THR341 TYR343 PRO344 LYS345 LEU346                                                                                        |
| Laurokamurene B     | -6.2 | HIS235 GLY248 HIS250 LYS290 VAL292 SER294 THR341 TYR343 PRO344 LYS345 LEU346                                                                                               |
| Laurokamurene C     | -6.5 | HIS235 HIS250 LYS290 VAL292 CYS293 SER294 THR341 TYR343 PRO344 LYS345 LEU346                                                                                               |
| Laurokamurene D     | -6   | HIS235 LEU246 GLY247 GLY248 HIS250 LYS290 VAL292 SER294 THR341 TYR343 PRO344<br>HIS235 LEU246 GLY247 GLY248 HIS250 LYS290 VAL292 CYS293 SER294 TRP333 THR341 TYR343        |
| Luzofuran           | -6.2 | PRO344 LYS345                                                                                                                                                              |
| Luzonenone          | -6   | HIS235 GLN245 LEU246 GLY247 GLY248 HIS250 LYS290 VAL292 SER294 THR341 TYR343 LEU346                                                                                        |
| Laurinterol         | -6.5 | HIS235 GLY248 HIS250 LYS290 VAL292 CYS293 SER294 THR341 TYR343 PRO344 LYS345 LEU346<br>HIS235 LEU246 GLY247 GLY248 HIS250 LYS290 VAL292 CYS293 SER294 TRP333 THR341 TYR343 |
| Laureacetal A       | -6   | PRO344                                                                                                                                                                     |
| Laurefurenyne C     | -6   | HIS235 GLN245 LEU246 GLY247 GLY248 HIS250 LYS290 TRP333 GLU340 THR341 TYR343<br>HIS235 LEU246 GLY247 GLY248 HIS250 LYS290 VAL292 CYS293 SER294 TRP333 THR341 TYR343        |
| Laurendecumenyne A  | -6.2 | PRO344<br>HIS235 GLY248 HIS250 ASN278 LYS290 VAL292 CYS293 SER294 THR341 TYR343 PRO344 LYS345                                                                              |
| Laurenone A         | -6.2 | LEU346<br>HIS235 LEU246 GLY247 GLY248 HIS250 LYS290 VAL292 SER294 THR341 TYR343 PRO344 LYS345                                                                              |
| Majapolene A        | -6.5 | LEU346                                                                                                                                                                     |
| Majapolene B        | -6.5 | HIS235 HIS250 LYS290 VAL292 CYS293 SER294 TRP333 GLU340 THR341 TYR343<br>HIS235 GLN245 LEU246 GLY247 GLY248 HIS250 LYS290 CYS291 VAL292 SER294 TRP333 THR341               |
| Mammeisin           | -6.9 | TYR343 PRO344 LYS345 LEU346                                                                                                                                                |



|                    |      |                                                                                                                                                              |
|--------------------|------|--------------------------------------------------------------------------------------------------------------------------------------------------------------|
| Neoirietetraol     | -6.2 | HIS235 LEU246 HIS250 LYS290 VAL292 CYS293 SER294 TRP333 THR341 TYR343 PRO344 LYS345 LEU346                                                                   |
| Notoryne           | -6   | HIS235 GLY248 HIS250 LYS290 VAL292 CYS293 SER294 TRP333 GLU340 THR341 TYR343 PRO344                                                                          |
| Okamurene A        | -6.2 | HIS235 GLY248 HIS250 LYS290 VAL292 SER294 THR341 TYR343 PRO344 LYS345 LEU346                                                                                 |
| Okamurene B        | -6.5 | HIS235 GLY248 HIS250 LYS290 VAL292 SER294 THR341 TYR343 PRO344 LYS345 LEU346                                                                                 |
| Okamurene D        | -6   | HIS235 GLY248 HIS250 LYS290 VAL292 SER294 THR341 TYR343 PRO344 LYS345 LEU346                                                                                 |
| Oxachamigrene      | -6   | HIS250 LYS290 VAL292 CYS293 SER294 TYR343 PRO344 LYS345 LEU346                                                                                               |
| Oryzalexin S       | -6.7 | HIS235 LEU246 GLY247 GLY248 HIS250 LYS290 TRP333 GLU340 THR341 TYR343<br>HIS235 LEU246 GLY247 GLY248 HIS250 LYS290 VAL292 CYS293 SER294 TRP333 THR341 TYR343 |
| Palisadin A        | -6.5 | PRO344                                                                                                                                                       |
| Pannosan           | -6.3 | HIS250 LYS290 VAL292 CYS293 SER294 TYR343 PRO344 LYS345 LEU346                                                                                               |
| Perforenone A      | -6   | HIS250 ASN278 LYS290 VAL292 CYS293 SER294 TYR343 PRO344 LYS345 LEU346                                                                                        |
| Prepacifenol       | -6.2 | HIS250 LYS290 VAL292 CYS293 SER294 TYR343 PRO344 LYS345 LEU346<br>HIS235 LEU246 GLY247 GLY248 HIS250 ASN278 LYS290 VAL292 CYS293 SER294 THR341 TYR343        |
| Seco-Laurokamurone | -6.5 | PRO344 LYS345 LEU346<br>HIS235 LEU246 GLY247 GLY248 HIS250 LYS290 VAL292 CYS293 SER294 THR341 TYR343 PRO344                                                  |
| Spirolaurenone     | -6   | LEU346                                                                                                                                                       |

**Table S10:** Natural products listed in lower-moderate class for nsp15

| NSP15 Endoribonuclease           |                                                             |                                                                                                                    |
|----------------------------------|-------------------------------------------------------------|--------------------------------------------------------------------------------------------------------------------|
| Ligands                          | Binding affinity<br>( <sup>-</sup> 7.0 to <sup>-</sup> 7.9) | Interacting amino acids                                                                                            |
| 2-Hydroxyluzofuranone A          | -7                                                          | HIS235 GLN245 LEU246 GLY247 GLY248 HIS250 ASN278 LYS290 VAL292 CYS293 SER294 THR341 TYR343 PRO344<br>LYS345 LEU346 |
| 3 alpha-hydroperoxy-3-epiaplysin | -7.2                                                        | HIS235 LEU246 GLY247 GLY248 LEU249 HIS250 LYS290 VAL292 SER294 THR341 TYR343 PRO344                                |
| 5alpha-Hydroxyaplystatin         | -7                                                          | HIS235 GLY247 GLY248 HIS250 LYS290 VAL292 CYS293 SER294 THR341 TYR343 PRO344 LYS345 LEU346                         |
| 10-epi-Dehydrothysiferol         | -7.7                                                        | HIS235 ASP240 HIS243 GLN245 LEU246 GLY247 GLY248 HIS250 LYS290 VAL292 TRP333 GLU340 THR341 TYR343                  |

|                                        |      |                                                                                                                               |
|----------------------------------------|------|-------------------------------------------------------------------------------------------------------------------------------|
| 11,14-dihydroaplysia-5,11,14,15-Tetrol | -7   | HIS235 LEU246 GLY248 HIS250 ASN278 LYS290 VAL292 CYS293 SER294 TRP333 THR341 TYR343 PRO344 LYS345 LEU346                      |
| 13-Hydroxyprathyrenol A                | -7.5 | HIS235 ASP240 HIS243 GLN245 LEU246 GLY247 GLY248 HIS250 LYS290 VAL292 SER294 TRP333 GLU340 THR341 TYR343 PRO344 LYS345 LEU346 |
| 15,16-Dehydrovenustatriol              | -7.9 | HIS235 LEU246 GLY247 GLY248 HIS250 LYS290 VAL292 SER294 TRP333 GLU340 THR341 TYR343 PRO344 LYS345 LEU346                      |
| Aplysistatin                           | -7   | HIS235 GLY247 GLY248 HIS250 LYS290 VAL292 THR341 TYR343                                                                       |
| Beta cryptoxanthin                     | -7.5 | HIS250 LYS290 VAL292 CYS293 SER294 VAL315 TRP333 CYS334 LYS335 ASP336 GLU340 THR341 TYR343 PRO344                             |
| Bromophycoic acid A                    | -7.7 | HIS235 GLN245 GLY247 GLY248 HIS250 ASN278 LYS290 VAL292 CYS293 SER294 TRP333 GLU340 THR341 TYR343 PRO344 LYS345 LEU346        |
| Bromophycoic acid D                    | -7.7 | HIS235 GLN245 LEU246 GLY247 GLY248 HIS250 LYS290 CYS291 VAL292 SER294 TRP333 THR341 TYR343 PRO344 LYS345 LEU346               |
| Bromophycoic acid E                    | -7.9 | HIS235 LEU246 GLY247 GLY248 HIS250 LYS290 VAL292 SER294 TRP333 GLU340 THR341 TYR343 PRO344 LYS345 LEU346                      |
| Bromophycolide A                       | -7.5 | HIS235 GLN245 LEU246 GLY247 GLY248 HIS250 LYS290 VAL292 CYS293 SER294 MET331 TRP333 THR341 TYR343 PRO344 LYS345               |
| Bromophycolide B                       | -7.2 | HIS235 GLN245 LEU246 GLY247 GLY248 HIS250 LYS290 CYS291 VAL292 THR341 TYR343                                                  |
| Bromophycolide C                       | -7.7 | HIS235 GLN245 LEU246 GLY247 GLY248 HIS250 ASN278 LYS290 VAL292 CYS293 SER294 THR341 TYR343 PRO344 LYS345 LEU346               |
| Bromophycolide D                       | -7.5 | HIS235 GLY247 GLY248 HIS250 LYS290 VAL292 SER294 TRP333 THR341 TYR343 LYS345 LEU346                                           |
| Bromophycolide E                       | -7.5 | HIS235 GLN245 LEU246 GLY247 GLY248 HIS250 LYS290 CYS291 VAL292 CYS293 SER294 THR341 TYR343 PRO344 LYS345 LEU346               |
| Bromophycolide F                       | -7.7 | HIS235 GLN245 LEU246 GLY247 GLY248 HIS250 LYS290 VAL292 TRP333 GLU340 THR341 TYR343                                           |
| Bromophycolide H                       | -7.2 | HIS235 HIS243 GLN245 LEU246 GLY247 GLY248 HIS250 LYS290 VAL292 TRP333 THR341 TYR343                                           |
| Bromophycolide I                       | -7.5 | HIS235 GLN245 LEU246 GLY247 GLY248 HIS250 LYS290 CYS291 VAL292 SER294 TRP333 THR341 TYR343 LEU346                             |
| Bromophycolide J                       | -7.5 | HIS235 GLN245 LEU246 GLY247 GLY248 HIS250 LYS290 CYS291 VAL292 SER294 GLU340 THR341 TYR343 LEU346                             |
| Bromophycolide M                       | -7.7 | HIS235 GLN245 LEU246 GLY248 HIS250 LYS290 CYS291 VAL292 SER294 THR341 TYR343 PRO344 LEU346                                    |

|                               |      |                                                                                                                                                                                                        |
|-------------------------------|------|--------------------------------------------------------------------------------------------------------------------------------------------------------------------------------------------------------|
| Bromophycolide N              | -7.7 | HIS235 LEU246 GLY247 GLY248 HIS250 LYS290 VAL292 CYS293 SER294 MET331 TRP333 THR341 TYR343 PRO344 LYS345 LEU346                                                                                        |
| Bromophycolide R              | -7.5 | HIS235 GLN245 LEU246 GLY247 GLY248 HIS250 LYS290 VAL292 SER294 THR341 TYR343 PRO344 LYS345 LEU346                                                                                                      |
| Barekoxide                    | -7.2 | HIS235 GLY248 HIS250 LYS290 VAL292 SER294 THR341 TYR343 PRO344 LYS345 LEU346<br>HIS235 GLN245 LEU246 GLY247 GLY248 HIS250 LYS290 VAL292 CYS293 SER294 THR341 TYR343 PRO344 LYS345                      |
| Bromophycolide S              | -7.7 | LEU346                                                                                                                                                                                                 |
| Callophycoic acid A           | -7   | HIS235 LEU246 GLY247 GLY248 HIS250 LYS290 VAL292 TRP333 GLU340 THR341 TYR343 LEU346<br>HIS235 GLN245 LEU246 GLY247 GLY248 HIS250 ASN278 LYS290 CYS291 VAL292 CYS293 SER294 THR341 TYR343               |
| Callophycoic acid C           | -7.7 | PRO344 LYS345 LEU346                                                                                                                                                                                   |
| Callophycoic acid D           | -7   | HIS235 GLN245 LEU246 GLY247 GLY248 HIS250 LYS290 CYS291 VAL292 THR341 TYR343                                                                                                                           |
| Callophycoic acid E           | -7   | GLY248 HIS250 LYS290 VAL292 CYS293 SER294 MET331 TRP333 THR341 TYR343 PRO344 LYS345                                                                                                                    |
| Callophycoic acid F           | -7   | HIS235 GLN245 LEU246 GLY247 GLY248 HIS250 LYS290 VAL292 SER294 THR341 TYR343 PRO344                                                                                                                    |
| Callophycoic acid H           | -7   | HIS235 LEU246 GLY247 GLY248 HIS250 LYS290 VAL292 SER294 TRP333 GLU340 THR341 TYR343 PRO344<br>HIS235 GLN245 LEU246 GLY247 GLY248 HIS250 LYS290 VAL292 CYS293 SER294 MET331 THR341 TYR343 PRO344        |
| Callophycoic acid I           | -7   | LYS345 LEU346                                                                                                                                                                                          |
| Cholest-5-en-3alpha-ol        | -7.7 | HIS235 GLN245 LEU246 GLY247 GLY248 HIS250 LYS290 VAL292 SER294 MET331 TYR343 PRO344 LYS345 LEU346<br>HIS235 GLN245 LEU246 GLY247 GLY248 HIS250 LYS290 VAL292 SER294 TRP333 GLU340 THR341 TYR343 PRO344 |
| Dehydrovenustatriol           | -7.2 | LYS345 LEU346<br>HIS235 LEU246 GLY248 HIS250 LYS290 VAL292 CYS293 SER294 TRP333 GLU340 THR341 TYR343 PRO344 LYS345                                                                                     |
| Isodehydrothyrsiferol         | -7.7 | LEU346<br>HIS235 GLN245 LEU246 GLY247 GLY248 HIS250 LYS290 VAL292 SER294 MET331 TRP333 THR341 TYR343 PRO344                                                                                            |
| Lactodehydrothyrsiferol       | -7   | LYS345 LEU346<br>HIS235 GLN245 LEU246 GLY247 GLY248 HIS250 LYS290 VAL292 SER294 TRP333 THR341 TYR343 PRO344 LYS345                                                                                     |
| Neurymenolide B               | -7.7 | LEU346<br>HIS235 GLY248 HIS250 ASN278 LYS290 VAL292 CYS293 SER294 MET331 TRP333 GLU340 THR341 TYR343 PRO344                                                                                            |
| Predehydrovenustatriolacetate | -7.2 | LYS345 LEU346<br>HIS235 GLN245 LEU246 GLY247 GLY248 HIS250 LYS290 VAL292 CYS293 SER294 TRP333 GLU340 THR341 TYR343                                                                                     |
| Prethyrsenol A                | -7.2 | PRO344 LYS345 LEU346                                                                                                                                                                                   |

|                         |      |                                                                                                                        |
|-------------------------|------|------------------------------------------------------------------------------------------------------------------------|
| Pseudodehydrothysiferol | -7.5 | HIS235 GLN245 LEU246 GLY247 GLY248 HIS250 LYS290 VAL292 CYS293 SER294 MET331 TRP333 THR341 TYR343 PRO344 LYS345 LEU346 |
| Saringosterol           | -7.5 | HIS235 GLY248 HIS250 ASN278 LYS290 VAL292 CYS293 SER294 TRP333 GLU340 THR341 TYR343 PRO344                             |

**Table S11:** Natural products listed in upper-moderate class for nsp15

| NSP15 Endoribonuclease       |                                       |                                                                                                                                             |
|------------------------------|---------------------------------------|---------------------------------------------------------------------------------------------------------------------------------------------|
| Ligands                      | Binding affinity<br>(-8.0 and higher) | Interacting amino acids                                                                                                                     |
| 5 alpha-cholestane-3,6-dione | -8.6                                  | HIS235 LEU246 GLY247 GLY248 HIS250 LYS290 VAL292 CYS293 SER294 VAL315 TRP333 CYS334 LYS335 GLU340 THR341 TYR343 PRO344                      |
| 6-hydroxycholest-4-en-3-one  | -8.2                                  | HIS235 GLY247 GLY248 HIS250 LYS290 VAL292 CYS293 SER294 TRP333 GLU340 THR341 TYR343 PRO344 LYS345 LEU346                                    |
| 15-Dehydroxythysenol A       | -8                                    | HIS235 GLN245 LEU246 GLY247 GLY248 HIS250 LYS290 VAL292 SER294 TRP333 GLU340 THR341 TYR343 PRO344 LYS345 LEU346                             |
| 16-Hydroxydehydrothysiferol  | -8.2                                  | HIS235 LEU246 GLY247 GLY248 HIS250 ASN278 LYS290 VAL292 CYS293 SER294 VAL315 TRP333 CYS334 LYS335 GLU340 THR341 TYR343 PRO344 LYS345 LEU346 |
| Beta-sitosterol              | -8                                    | HIS235 GLY248 HIS250 ASN278 LYS290 VAL292 CYS293 SER294 VAL315 TRP333 CYS334 LYS335 GLU340 THR341 TYR343 PRO344 LEU346                      |
| Brassicasterol               | -8.5                                  | HIS235 GLY248 HIS250 LYS290 VAL292 CYS293 SER294 VAL315 TRP333 CYS334 LYS335 GLU340 THR341 TYR343 PRO344                                    |
| Bromophycoic acid B          | -8.5                                  | HIS235 GLY247 GLY248 HIS250 LYS290 VAL292 CYS293 SER294 TRP333 GLU340 THR341 TYR343 PRO344 LYS345 LEU346                                    |
| Bromophycoic acid C          | -8.5                                  | HIS235 GLY247 GLY248 HIS250 LYS290 VAL292 CYS293 SER294 TRP333 GLU340 THR341 TYR343 PRO344 LYS345 LEU346                                    |
| Bromophycolide G             | -8.2                                  | HIS235 GLN245 LEU246 GLY247 GLY248 HIS250 ASN278 LYS290 VAL292 CYS293 SER294 THR341 TYR343 PRO344 LYS345 LEU346                             |
| Bromophycolide K             | -8                                    | HIS235 LEU246 GLY247 GLY248 HIS250 LYS290 VAL315 MET331 TRP333 GLU340 THR341 TYR343                                                         |
| Bromophycolide L             | -8                                    | HIS235 LEU246 GLY247 GLY248 HIS250 LYS290 VAL292 SER294 TRP333 THR341 TYR343 LEU346                                                         |
| Bromophycolide O             | -8.5                                  | HIS235 GLN245 LEU246 GLY247 GLY248 HIS250 LYS290 CYS291 VAL292 TRP333 THR341 TYR343                                                         |
| Bromophycolide P             | -8.2                                  | HIS235 GLN245 LEU246 GLY247 GLY248 HIS250 LYS290 CYS291 VAL292 SER294 THR341 TYR343                                                         |
| Bromophycolide Q             | -8.2                                  | HIS235 ASP240 HIS243 GLN245 LEU246 GLY247 GLY248 HIS250 LYS290 TRP333 GLU340 THR341 TYR343                                                  |
| Bromophycolide T             | -8.7                                  | HIS235 GLN245 LEU246 GLY248 HIS250 LYS290 VAL292 CYS293 SER294 TRP333 THR341 TYR343 PRO344 LEU346                                           |
| Bromophycolide U             | -8                                    | GLN245 LEU246 GLY247 HIS250 LYS290 VAL292 CYS293 SER294 THR341 TYR343 PRO344 LEU346                                                         |

|                        |      |                                                                                                                                                                                                                                           |
|------------------------|------|-------------------------------------------------------------------------------------------------------------------------------------------------------------------------------------------------------------------------------------------|
| Callicladol            | -8.2 | HIS235 LEU246 GLY248 HIS250 LYS290 VAL292 SER294 VAL315 TRP333 CYS334 LYS335 GLU340 THR341 TYR343 PRO344 LYS345 LEU346                                                                                                                    |
| Callophycoic acid B    | -8.2 | HIS235 GLY248 HIS250 LYS290 VAL292 CYS293 SER294 TRP333 GLU340 THR341 TYR343 PRO344 LYS345 LEU346                                                                                                                                         |
| Campesterol            | -8.2 | HIS235 GLY248 HIS250 ASN278 LYS290 VAL292 CYS293 SER294 VAL315 TRP333 CYS334 LYS335 GLU340 THR341 TYR343 PRO344<br>HIS235 LEU246 GLY247 GLY248 HIS250 LYS290 VAL292 CYS293 SER294 VAL315 TRP333 CYS334 LYS335 GLU340 THR341 TYR343 PRO344 |
| Cholest-4-en-3,6-dione | -8.2 | PRO344<br>HIS235 GLY248 HIS250 ASN278 LYS290 VAL292 CYS293 SER294 VAL315 TRP333 CYS334 GLU340 THR341 TYR343 PRO344 LYS345                                                                                                                 |
| Cholest-4-en-3-one     | -8   | LEU346                                                                                                                                                                                                                                    |
| Cholest-5-en-3beta-ol  | -8.2 | HIS235 GLY248 HIS250 ASN278 LYS290 VAL292 CYS293 SER294 VAL315 TRP333 CYS334 LYS335 GLU340 THR341 TYR343 PRO344<br>HIS235 GLY248 HIS250 ASN278 LYS290 VAL292 CYS293 SER294 VAL315 TRP333 CYS334 LYS335 GLU340 THR341 TYR343 PRO344        |
| Dehydrothyrsiferol     | -8.2 | LYS345 LEU346                                                                                                                                                                                                                             |
| Laurebiphenyl          | -8   | HIS235 LEU246 GLY247 GLY248 HIS250 LYS290 VAL292 CYS293 SER294 MET331 THR341 TYR343 PRO344 LYS345 LEU346                                                                                                                                  |
| Lithothamin A          | -8   | HIS235 GLN245 LEU246 GLY247 GLY248 HIS250 LYS290 VAL292 VAL315 MET331 TRP333 LYS335 GLU340 THR341 TYR343                                                                                                                                  |
| Neurymenolide A        | -8   | HIS235 GLN245 LEU246 GLY247 GLY248 HIS250 LYS290 VAL292 SER294 THR341 TYR343 PRO344 LYS345 LEU346                                                                                                                                         |
| Stigmasterol           | -8.3 | HIS235 GLY248 HIS250 LYS290 VAL292 CYS293 SER294 VAL315 TRP333 CYS334 LYS335 GLU340 THR341 TYR343 PRO344<br>HIS235 LEU246 GLY247 GLY248 LEU249 HIS250 ASN278 LYS290 VAL292 CYS293 SER294 VAL315 TRP333 CYS334 LYS335 GLU340               |
| Thyrsenol A            | -8.4 | THR341 TYR343 PRO344 LYS345 LEU346<br>HIS235 LEU246 GLY247 GLY248 HIS250 ASN278 LYS290 VAL292 CYS293 SER294 VAL315 TRP333 CYS334 LYS335 GLU340 THR341                                                                                     |
| Thyrsenol B            | -8   | TYR343 PRO344 LYS345 LEU346<br>HIS235 LEU246 GLY247 GLY248 HIS250 ASN278 LYS290 VAL292 CYS293 SER294 VAL315 TRP333 CYS334 LYS335 GLU340 THR341                                                                                            |
| Thyrsiferol            | -8.4 | TYR343 PRO344 LYS345 LEU346                                                                                                                                                                                                               |

**Table S12:** Natural products with highest binding affinity for nsp15

| MD simulations for RdRp N-terminal |                   |                     |
|------------------------------------|-------------------|---------------------|
| Bromophycolide R                   | Bromophycolide S  | Bromophycoic acid C |
| TYR: 32 - 1.0550                   | TYR: 32 - 0.3440  | TYR: 32 - 0.6340    |
| LYS: 47 - 0.5300                   | LYS: 47 - 0.3080  | LYS: 47 - 0.7850    |
| TYR: 122 - 0.5940                  | TYR: 122 - 0.8180 | TYR: 122 - 0.8310   |

|                   |                   |                   |
|-------------------|-------------------|-------------------|
| TYR: 129 - 0.5880 | TYR: 129 - 0.1000 | TYR: 129 - 0.1690 |
| HIS: 133 - 0.8190 | HIS: 133 - 0.1590 | HIS: 133 - 0.6030 |
| ASN: 138 - 1.6060 | ASN: 138 - 1.0270 | ASN: 138 - 1.5620 |
| ASP: 140 - 0.9680 | ASP: 140 - 0.8210 | ASP: 140 - 0.8730 |
| THR: 141 - 0.7150 | THR: 141 - 0.6350 | THR: 141 - 0.8220 |
| SER: 709 - 0.6290 | SER: 709 - 0.3160 | SER: 709 - 0.6330 |
| ASN: 781 - 0.3880 | ASN: 781 - 0.2730 | ASN: 781 - 0.6380 |

**Table S13:** MD Simulations for N-Terminal docked complexes

| MD simulations for RdRp C-Terminal |                   |                   |                   |
|------------------------------------|-------------------|-------------------|-------------------|
| Bromophycolide E                   | Bromophycolide H  | Bromophycolide P  | Thyrsenol A       |
| ASP: 618 - 0.7600                  | ASP: 618 - 0.7160 | ASP: 618 - 0.3580 | ASP: 618 - 0.3390 |
| SER: 759 - 0.7200                  | SER: 759 - 0.9010 | SER: 759 - 0.5940 | SER: 759 - 0.4980 |
| ASP: 760 - 0.5590                  | ASP: 760 - 0.6580 | ASP: 760 - 0.5140 | ASP: 760 - 0.4010 |
| ASP: 761 - 0.1390                  | ASP: 761 - 0.5400 | ASP: 761 - 0.3450 | ASP: 761 - 0.2570 |

**Table S14:** MD Simulations for C-Terminal docked complexes

| MD simulations for nsp15 |                     |                   |
|--------------------------|---------------------|-------------------|
| Bromophycoic acid B      | Bromophycoic acid C | Floridoside       |
| HIS: 242 - 1.8600        | HIS: 242 - 2.7260   | HIS: 242 - 1.6760 |
| HIS: 234 - 0.4370        | HIS: 234 - 0.7460   | HIS: 234 - 0.4700 |
| HIS: 235 - 0.3390        | HIS: 235 - 0.5010   | HIS: 235 - 0.2760 |
| HIS: 249 - 0.7130        | HIS: 249 - 0.3880   | HIS: 249 - 0.7540 |
| HIS: 250 - 0.4790        | HIS: 250 - 0.4230   | HIS: 250 - 0.5150 |
| LYS: 289 - 0.5850        | LYS: 289 - 0.7520   | LYS: 289 - 0.2510 |
| LYS: 290 - 0.5010        | LYS: 290 - 0.5080   | LYS: 290 - 0.2030 |
| SER: 294 - 0.1720        | SER: 294 - 0.4170   | SER: 294 - 0.1340 |

**Table S15:** MD Simulations for nsp15 docked complexes

| Top Ligands         | Formulae                                                       | SMILES                                                                                               |
|---------------------|----------------------------------------------------------------|------------------------------------------------------------------------------------------------------|
| Bromophycoic acid B | C <sub>27</sub> H <sub>37</sub> BrO <sub>5</sub>               | <chem>C[C@@]12CC[C@H]([C@]([C@H]1CC[C@](C2)([C@H]3Cc4cc(ccc4O3)C(=O)O)O)(C)C/C=C/C(C)(C)O)Br</chem>  |
| Bromophycoic acid C | C <sub>27</sub> H <sub>37</sub> BrO <sub>6</sub>               | <chem>C[C@@]12CC[C@H]([C@]([C@H]1CC[C@](C2)([C@H]3Cc4cc(ccc4O3)C(=O)O)O)(C)C/C=C/C(C)(C)OO)Br</chem> |
| Bromophycolide E    | C <sub>27</sub> H <sub>36</sub> Br <sub>2</sub> O <sub>4</sub> | <chem>CC(=C)C1CCC(C(CCC2(C(CCC(=C)C2CC3=C(C=CC(=C3)C(=O)O1)O)Br)C)Br)(C)O</chem>                     |
| Bromophycolide H    | C <sub>27</sub> H <sub>37</sub> Br <sub>3</sub> O <sub>4</sub> | <chem>CC1(C(CCC(C(CCC2(C(CCC(=C)C2CC3=C(C=CC(=C3)C(=O)O1)O)Br)C)Br)(C)O)Br)C</chem>                  |
| Bromophycolide P    | C <sub>27</sub> H <sub>36</sub> Br <sub>2</sub> O <sub>4</sub> | <chem>CC1(C2CCC(O1)(C(CCC3(C(CCC(=C)C3CC4=C(C=CC(=C4)C(=O)O2)O)Br)C)Br)C)C</chem>                    |
| Bromophycolide R    | C <sub>27</sub> H <sub>35</sub> BrO <sub>4</sub>               | <chem>CC(=C)C1CCC2(C(O2)CCC3(C(CCC(=C)C3CC4=C(C=CC(=C4)C(=O)O1)O)Br)C)C</chem>                       |
| Bromophycolide S    | C <sub>27</sub> H <sub>36</sub> Br <sub>2</sub> O <sub>4</sub> | <chem>CC12CCC(OC(=O)C3=CC(=C(C=C3)O)CC4C(=C)CCC(C4(CCC1O2)C)Br)C(C)(C)Br</chem>                      |
| Floridoside         | C <sub>9</sub> H <sub>18</sub> O <sub>8</sub>                  | <chem>C(C1C(C(C(C(O1)OC(CO)CO)O)O)O)O</chem>                                                         |
| Thyrsenol A         | C <sub>30</sub> H <sub>51</sub> BrO <sub>8</sub>               | <chem>CC1(C(CCC(O1)(C)C2CCC3(C(O2)CC=C(O3)C(CCC(C4(CCC(O4)C(C)(C)O)C)O)(CO)O)C)Br)C</chem>           |

**Table S16:** SMILES line notation for selected NPs

**Disclaimer/Publisher's Note:** The statements, opinions and data contained in all publications are solely those of the individual author(s) and contributor(s) and not of MDPI and/or the editor(s). MDPI and/or the editor(s) disclaim responsibility for any injury to people or property resulting from any ideas, methods, instructions or products referred to in the content.
